# Supplementary material
Source: publisher figshare collection journal article supplement (https://asha.figshare.com/articles/dataset/_/13877999)

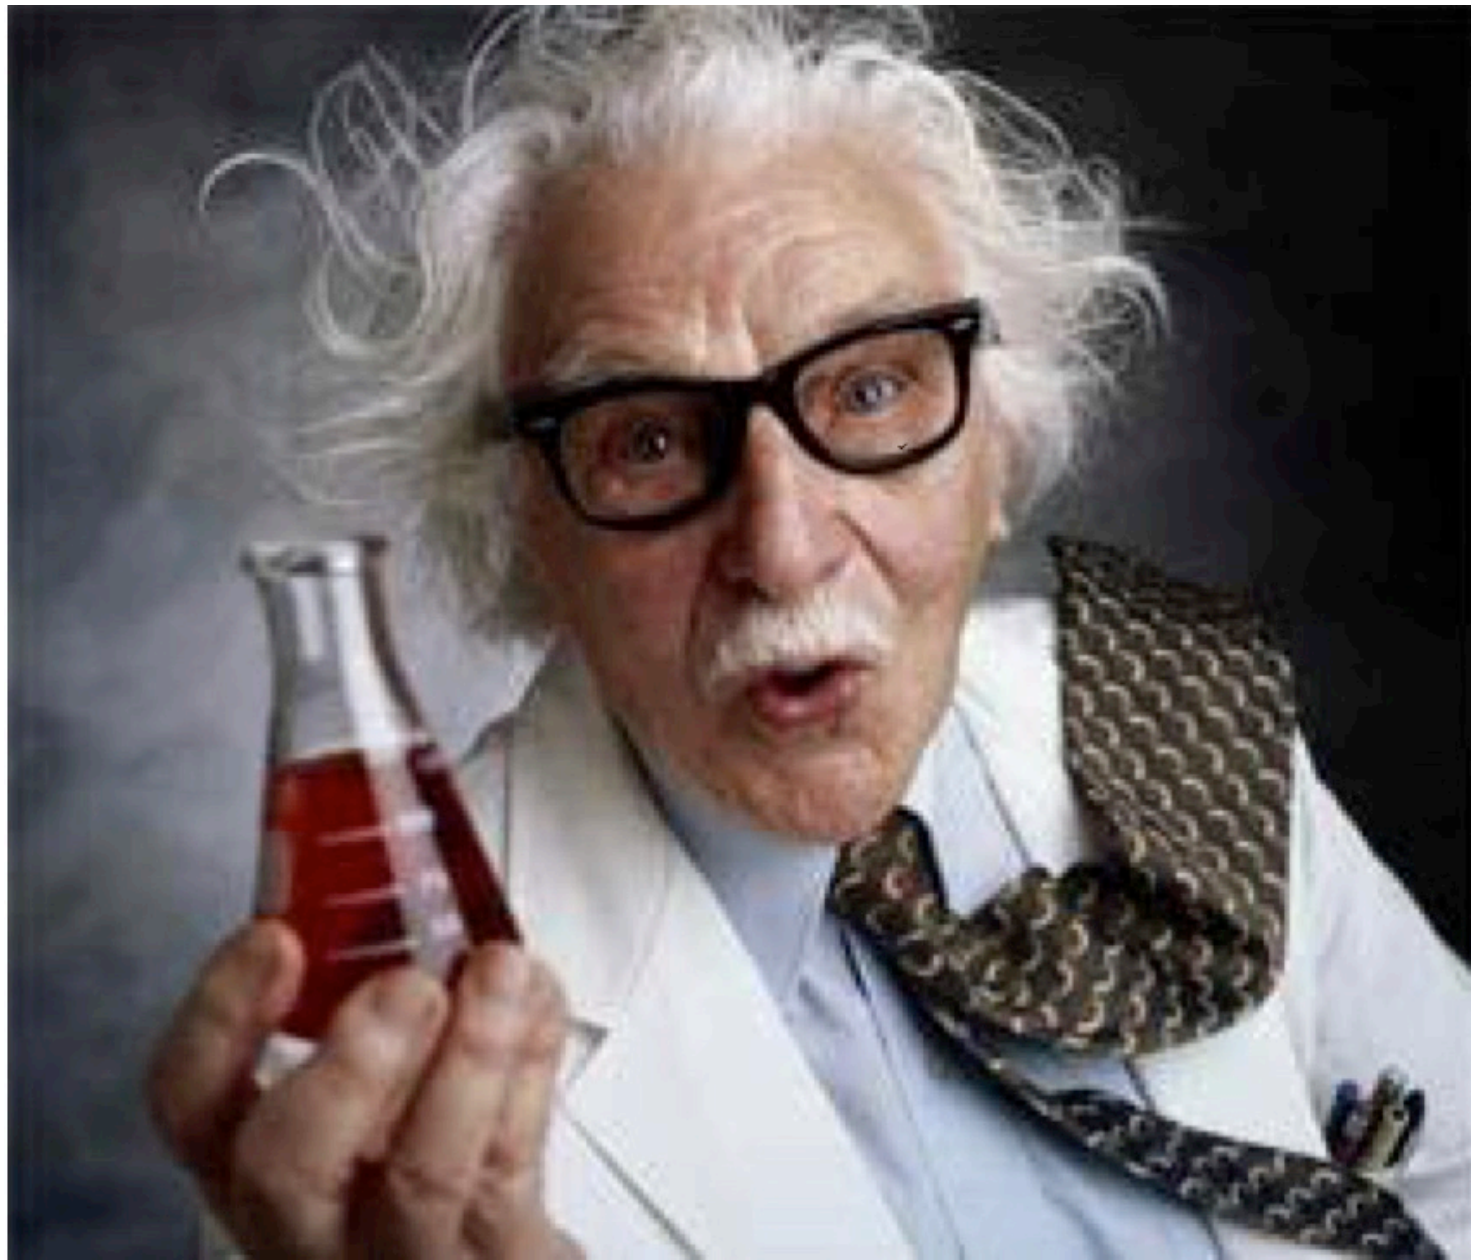

Set 1

Reading

Ben's fish tank is dirty. Ben picks up the veap. The veap is used to clean fish tanks. Ben puts the veap in the fish tank. The veap cleans Ben's fish tank.

Jane is hungry, but the bread is not toasted. Jane takes out the crig. The crig is used to toast bread. Jane cuts the bread with the crig. The crig toasts Jane's bread.

Nick wants to play a game, but the cards are not mixed. Nick takes out the zabe. The zabe is used to mix cards. Nick puts the cards into the zabe. The zabe mixes Nick's cards.

# Word Choice

pabe

1

paib

2

zabe

3

zaib

4



feep

1

veap

2

feap

3

veep

4

krid

1

crig

2

krig

3

crid

4

# Picture Choice

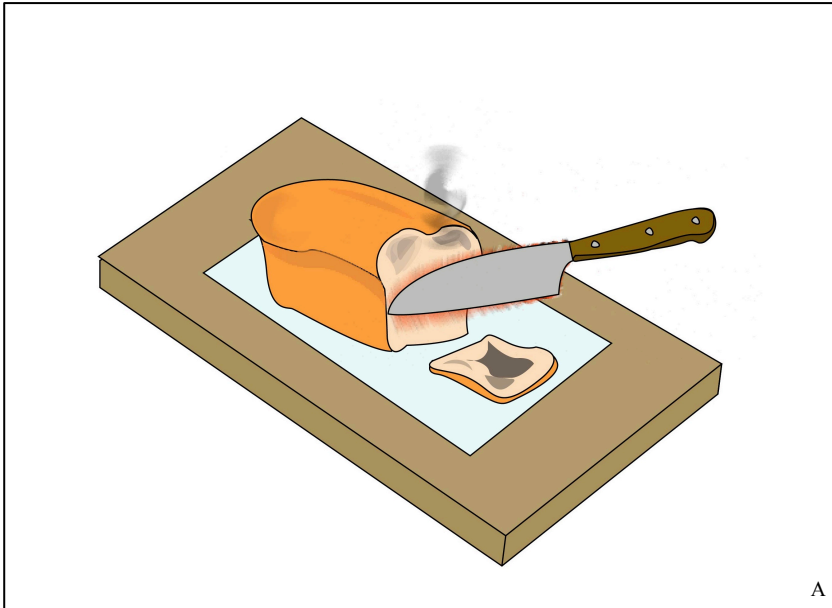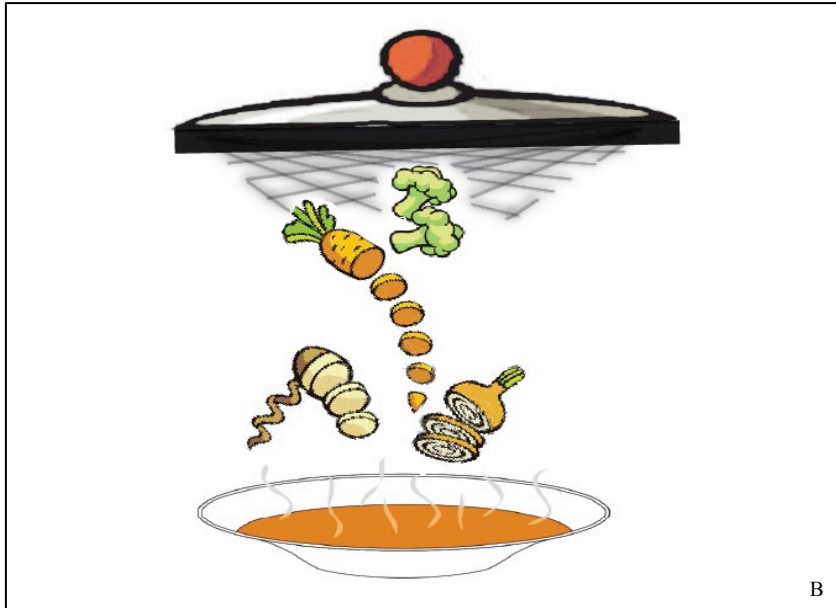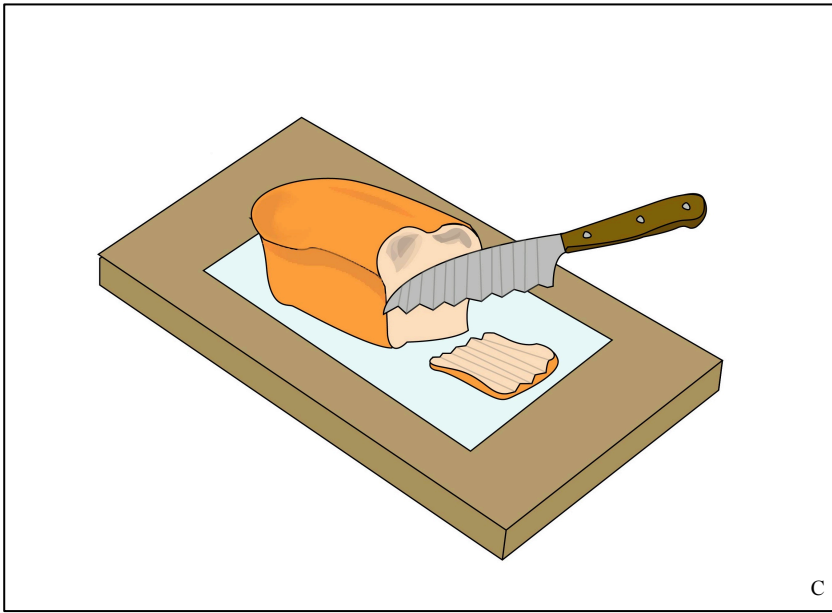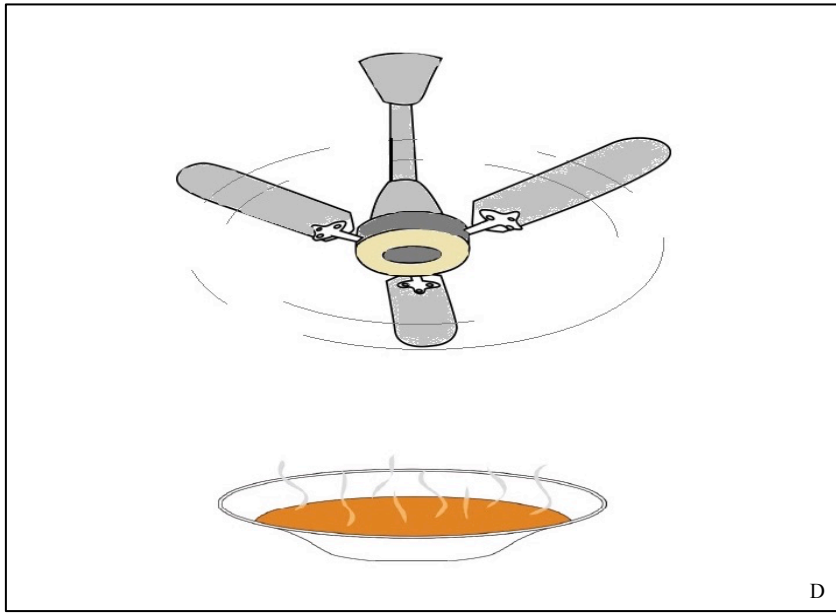

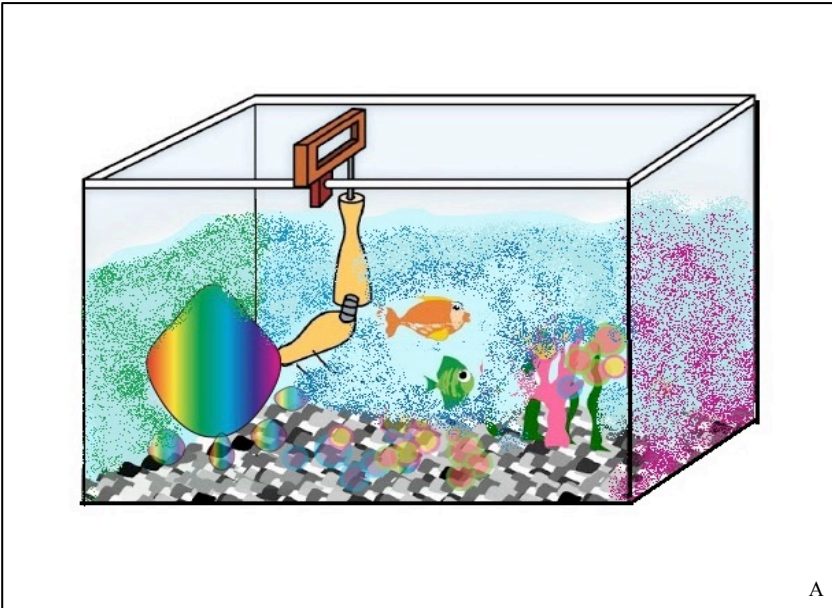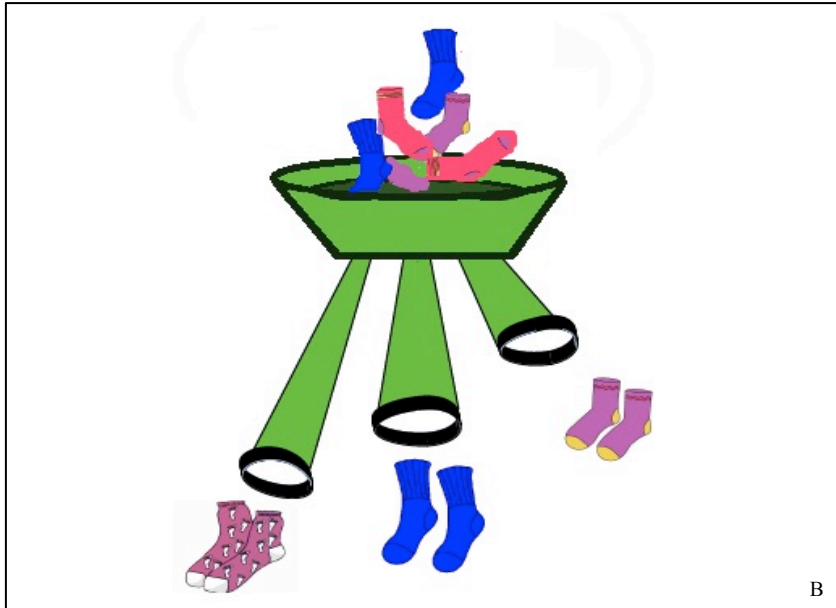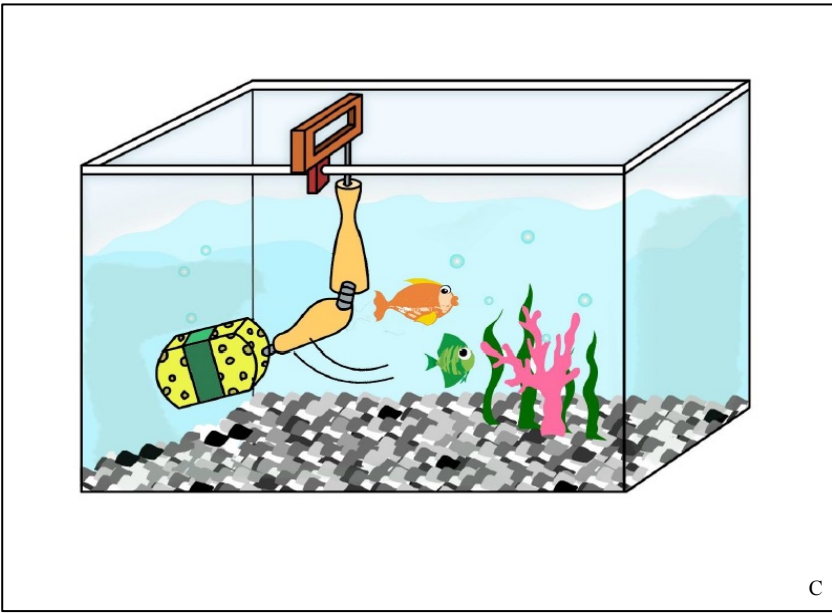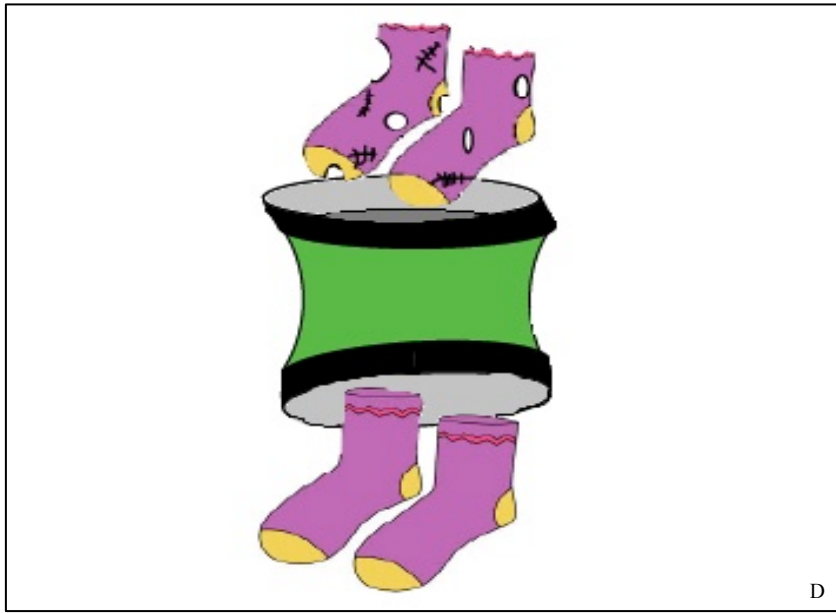

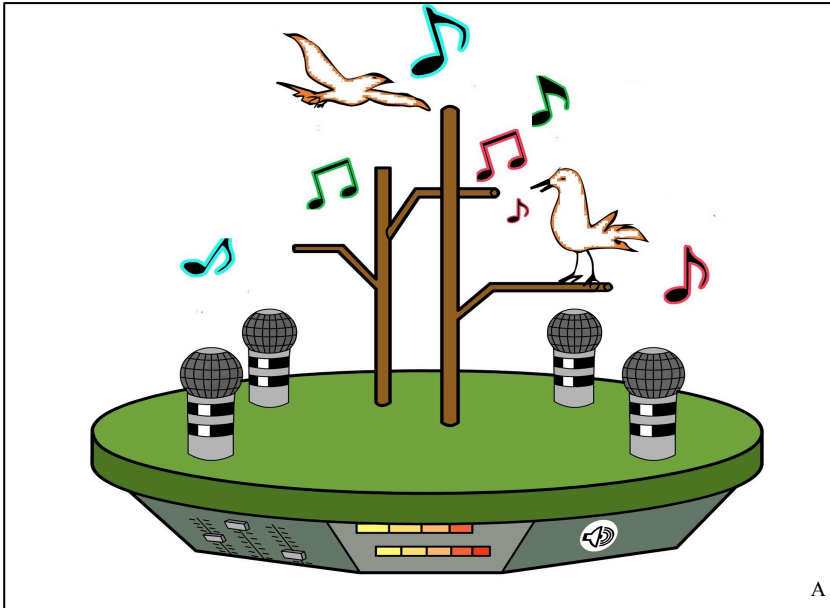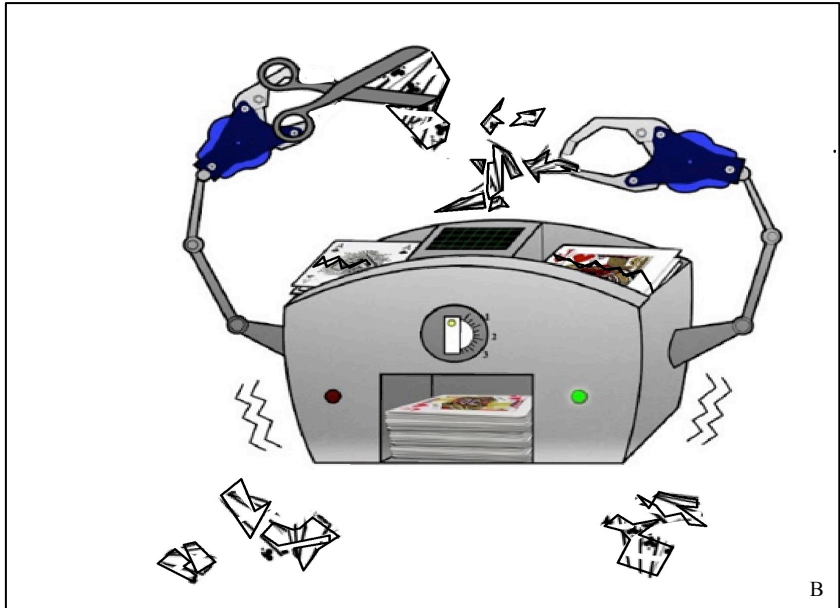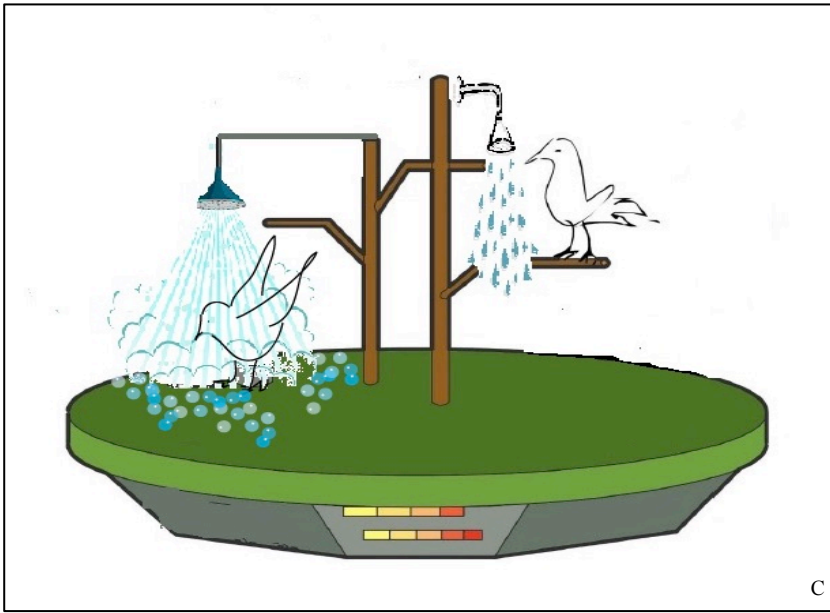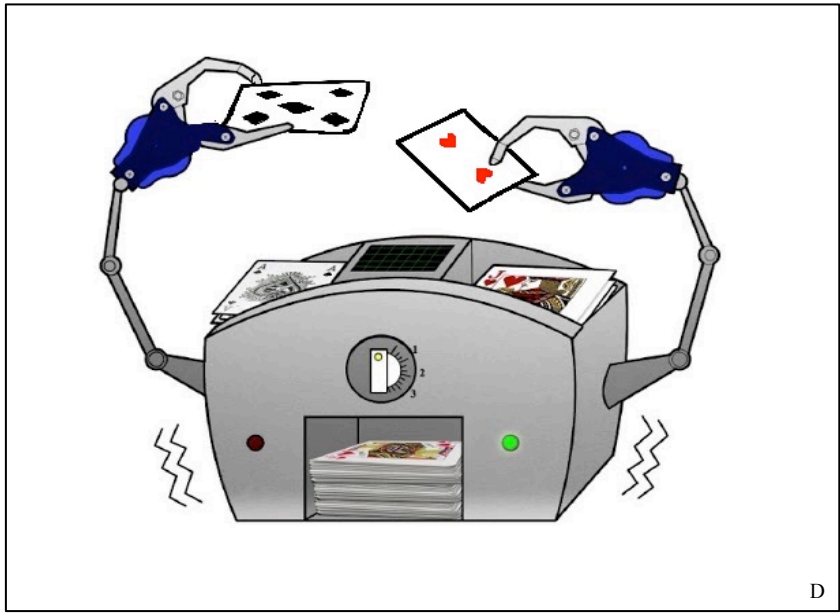

## Set 2

Reading



Jack the cat cannot read the paper.

Jack picks up the lurg. The lurg is used to read the paper. Jack puts the lurg on the paper. The lurg helps Jack read the paper.

Anne has an orange but no juice. Anne looks for the kleb. The kleb is used to get juice from oranges. Anne puts the kleb on the orange. The kleb helps Anne get juice from the orange.

Joe forgets one girl's name. Joe turns on the tude. The tude is used to remember people's names. Joe puts the tude near the girl. The tude helps Joe remember the girl's name.

# Word Choice

klet

1

cleb

2

kleb

3

clet

4

tude

1

mewd

2

tewd

3

mude

4

lurg

1

lerg

2

terg

3

turg

4

# Picture Choice



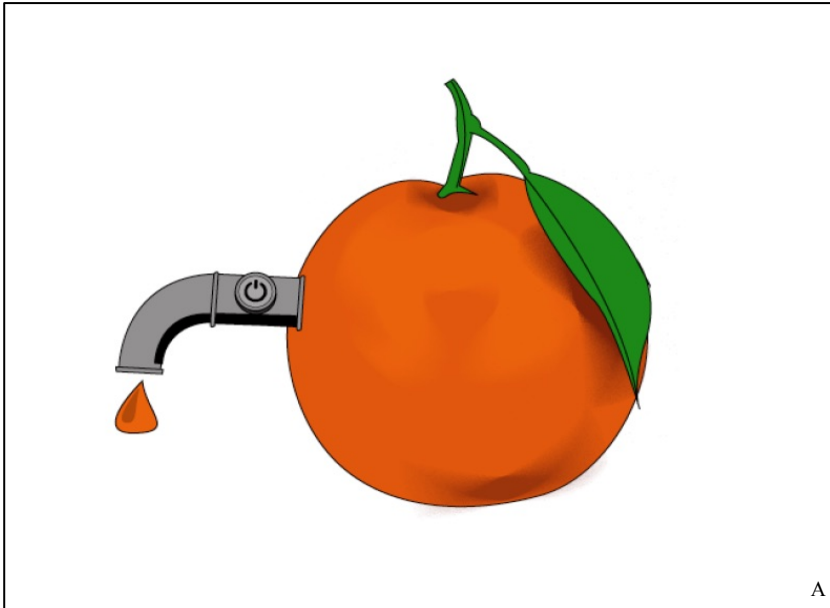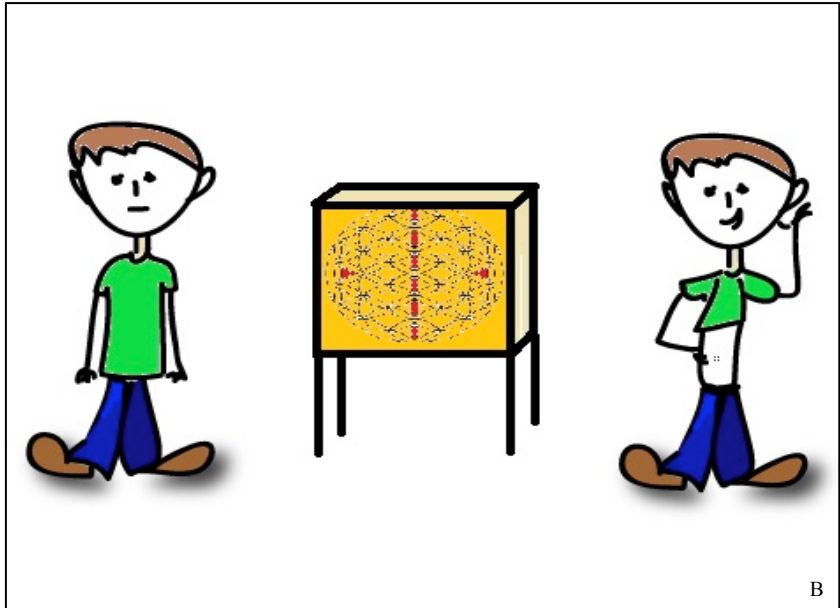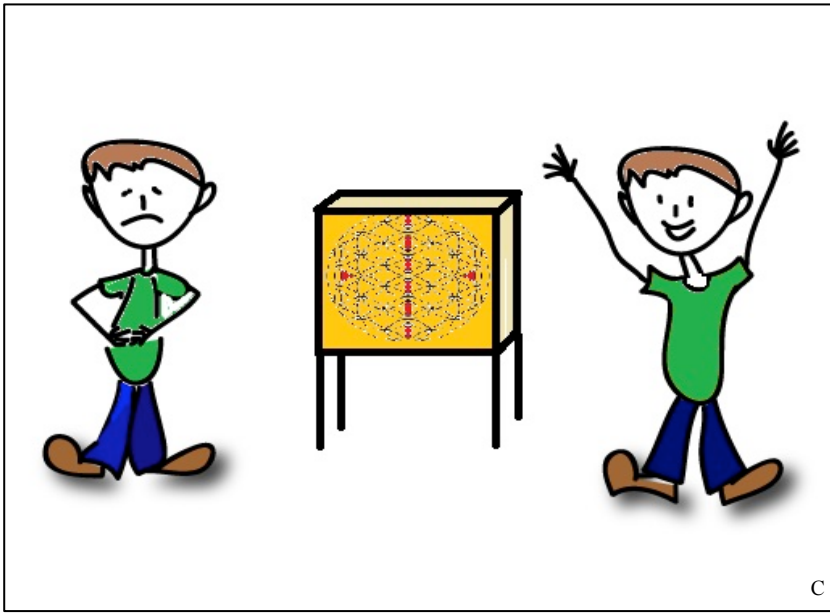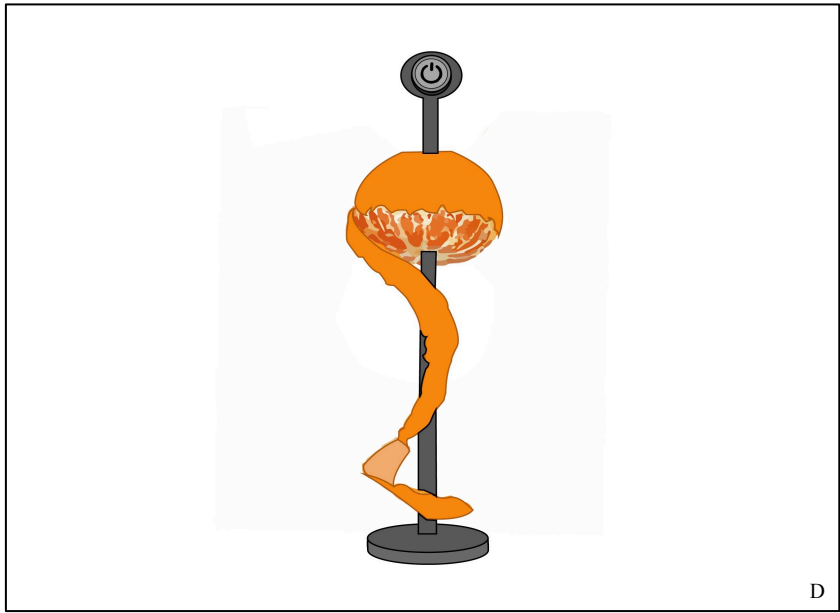

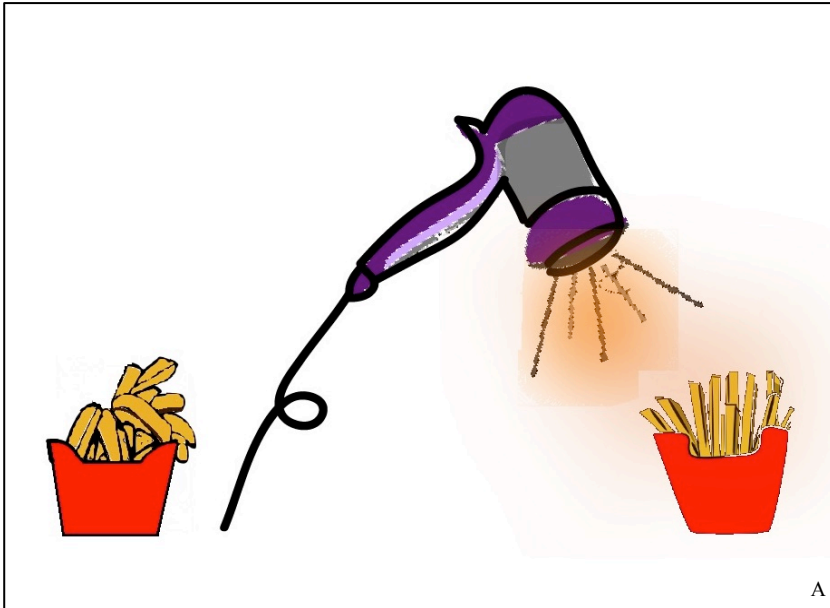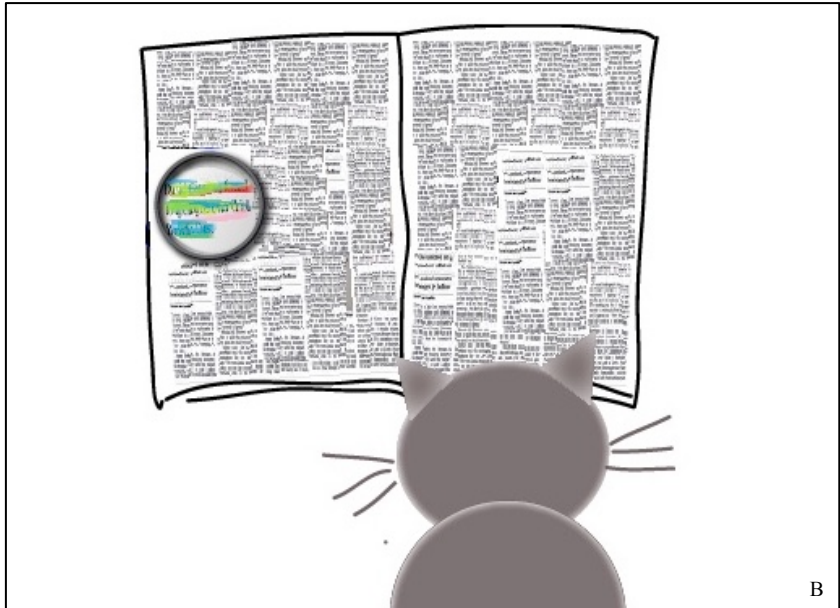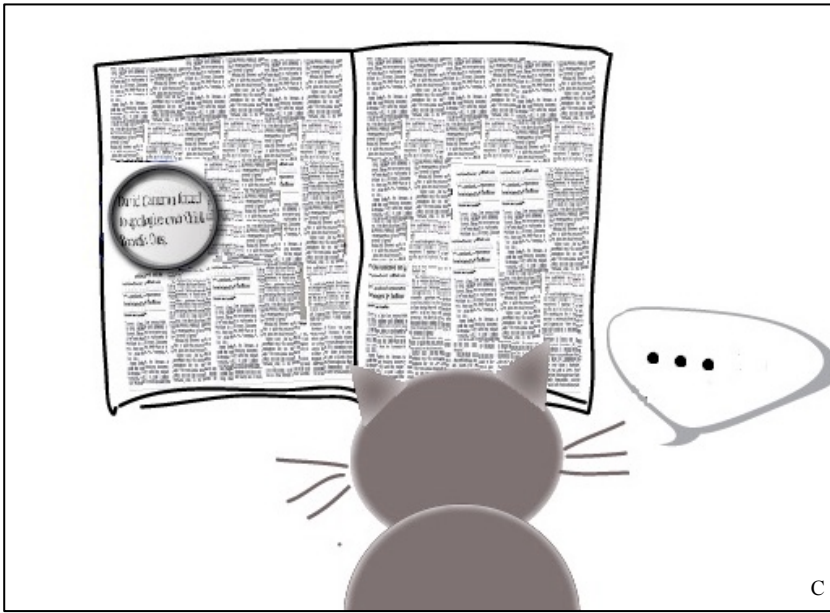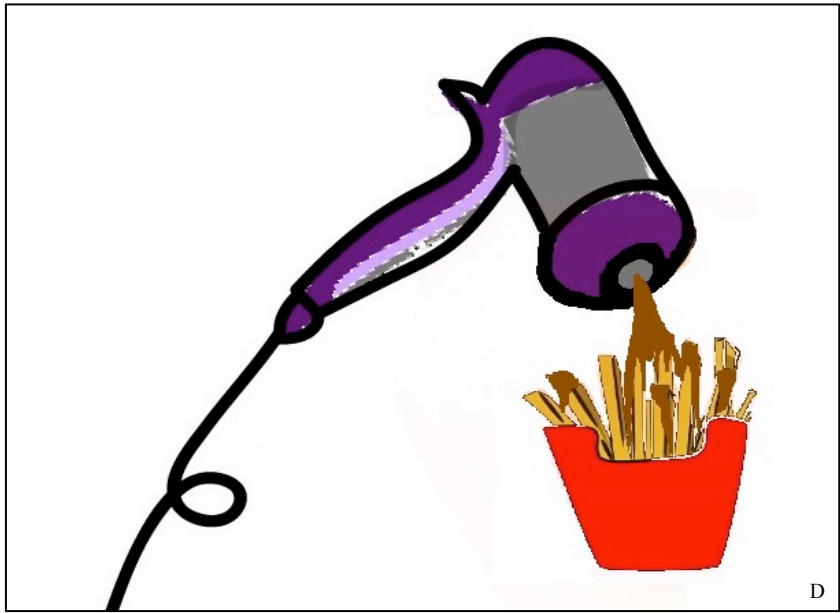

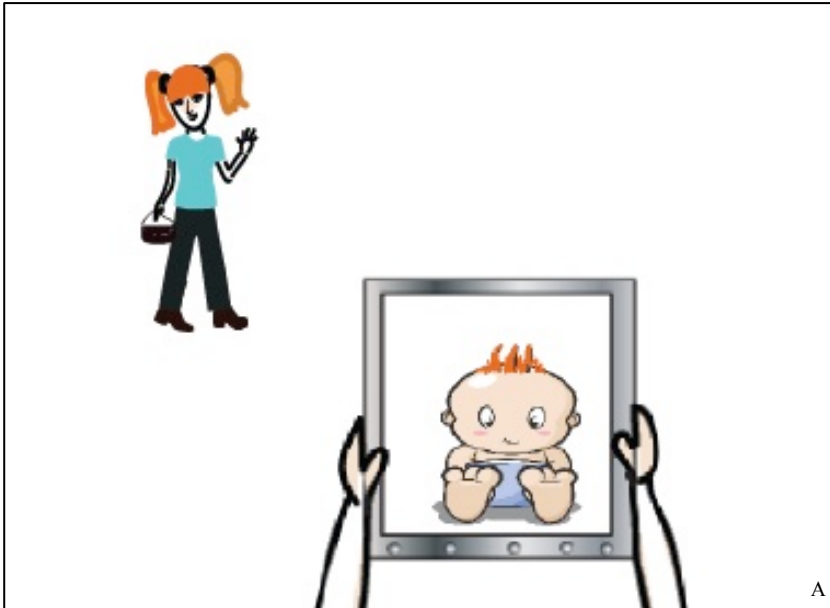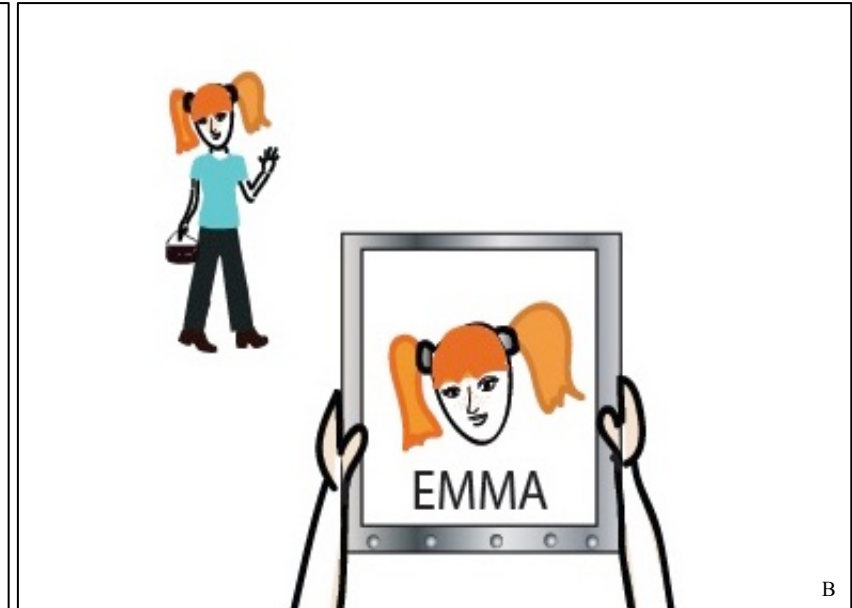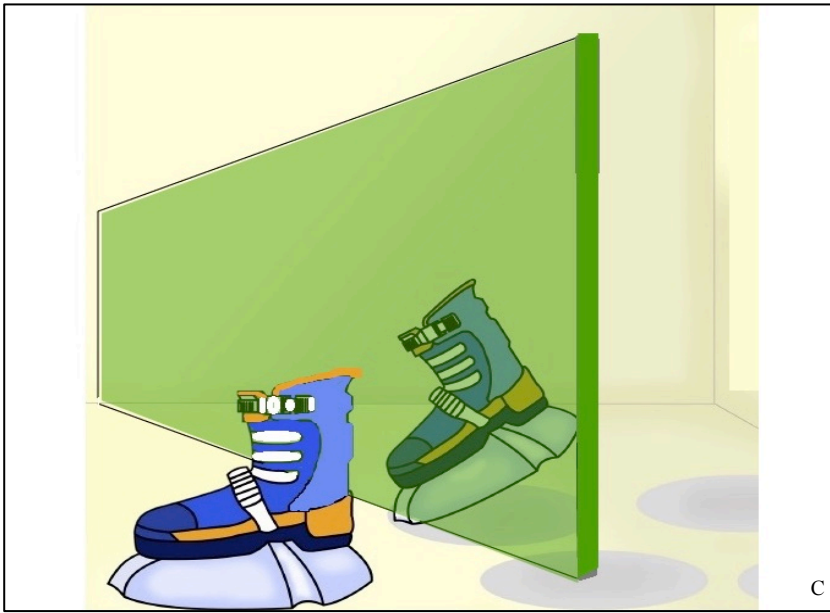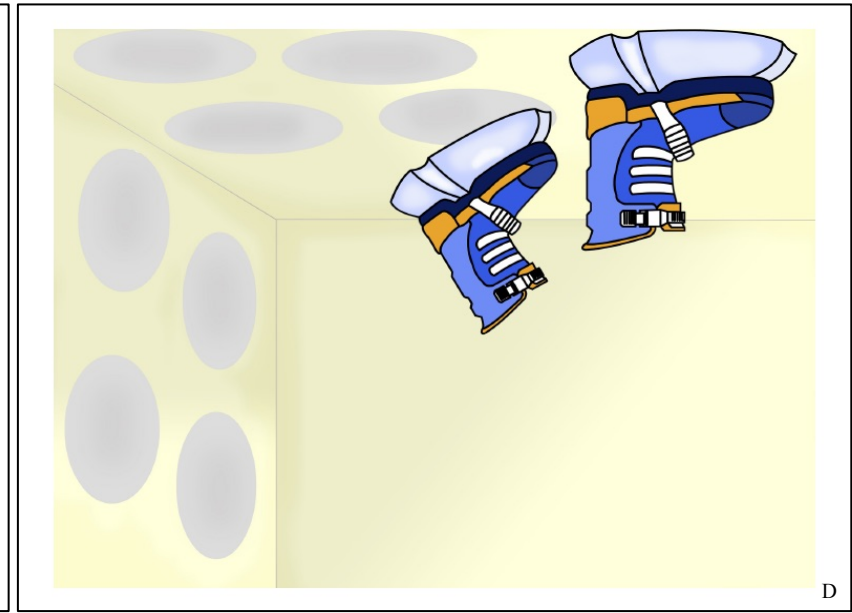

# Set 3

Reading

No one throws balls for Rex the dog.  
Rex passes by the yaif. The yaif is  
used to throw balls. Rex puts the balls  
into the yaif. The yaif throws balls for  
Rex.

Pip has sand all over his body. Pip finds the bope. The bope is used to take the sand away from the body. Pip puts his body near the bope. The bope takes the sand off Pip's body.

Pam's flowers look dull. Pam takes out the hewl. The hewl is used to make flowers look nice. Pam moves the hewl over the flowers. The hewl makes Pam's flowers look nice.



# Word Choice

yafe

1

vaif

2

yaif

3

vafe

4

boap

1

jope

2

joap

3

bope

4

zewl

1

hewl

2

zule

3

hule

4

# Picture Choice

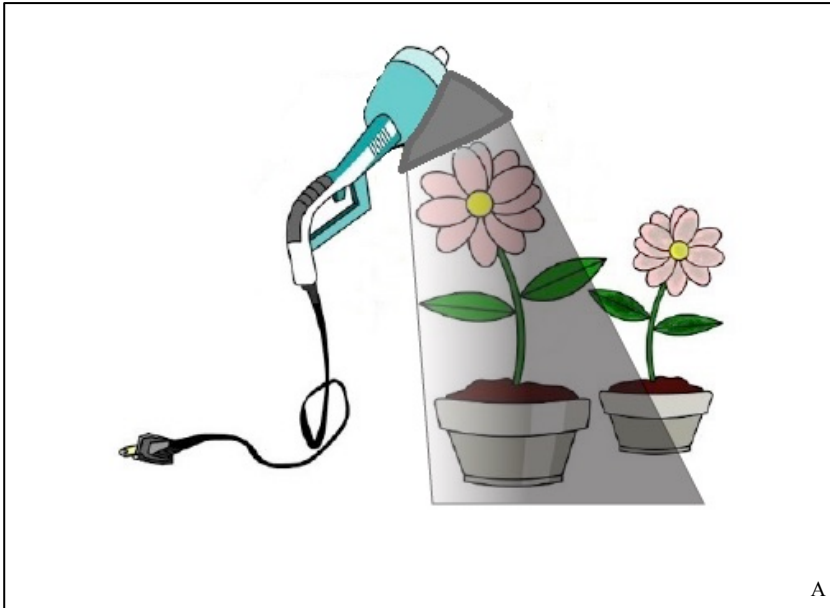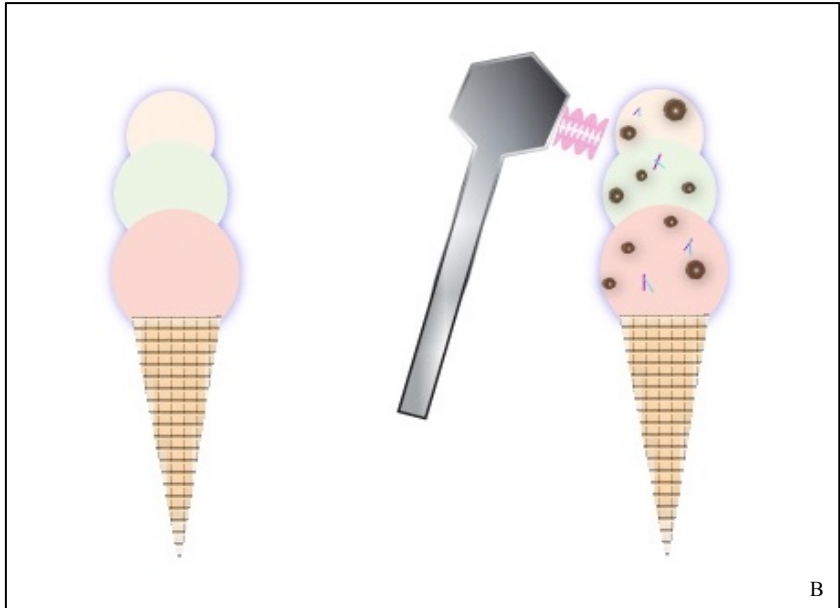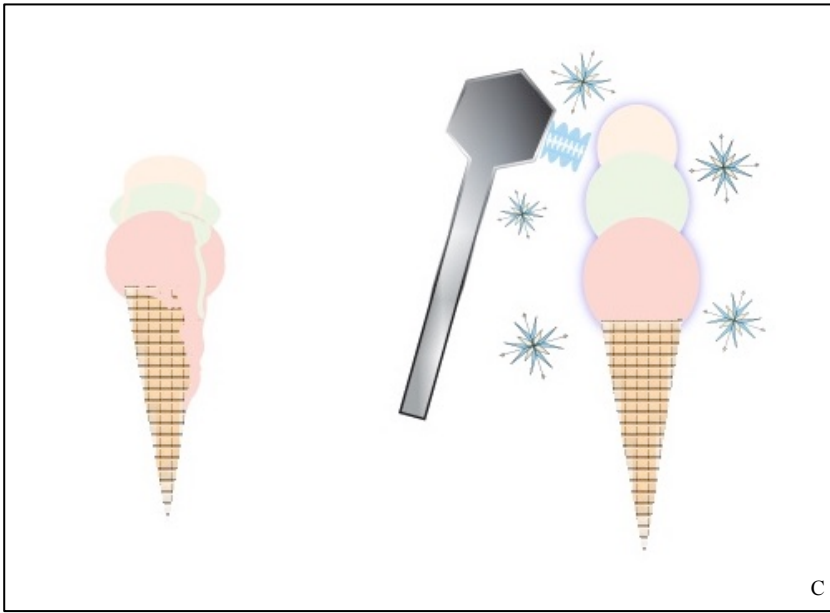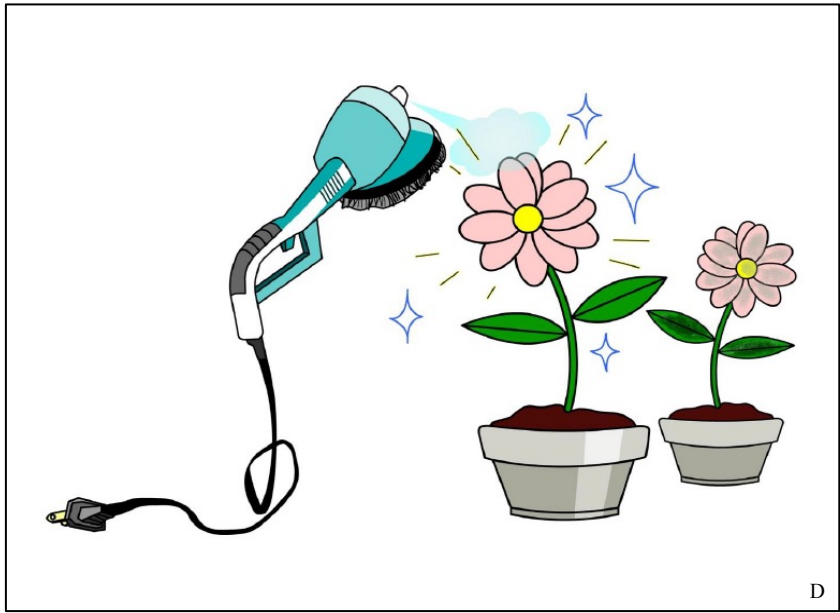

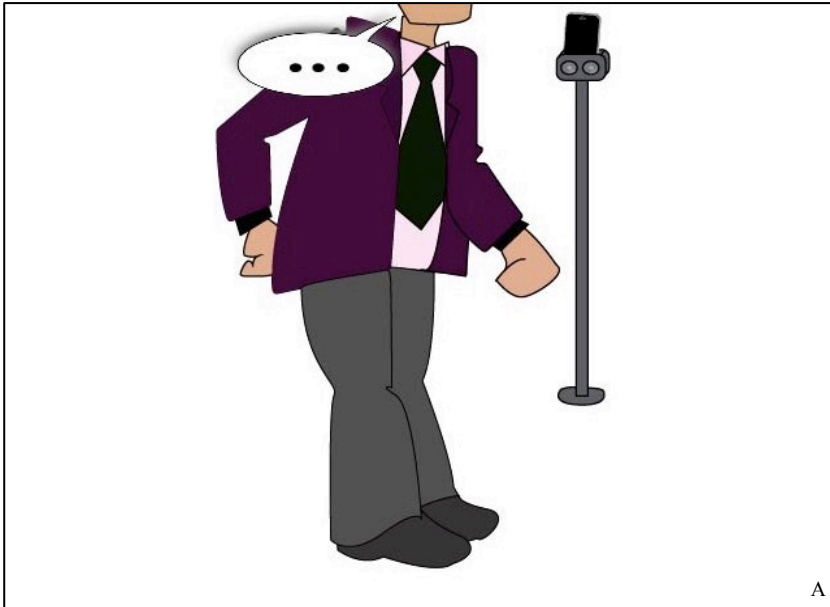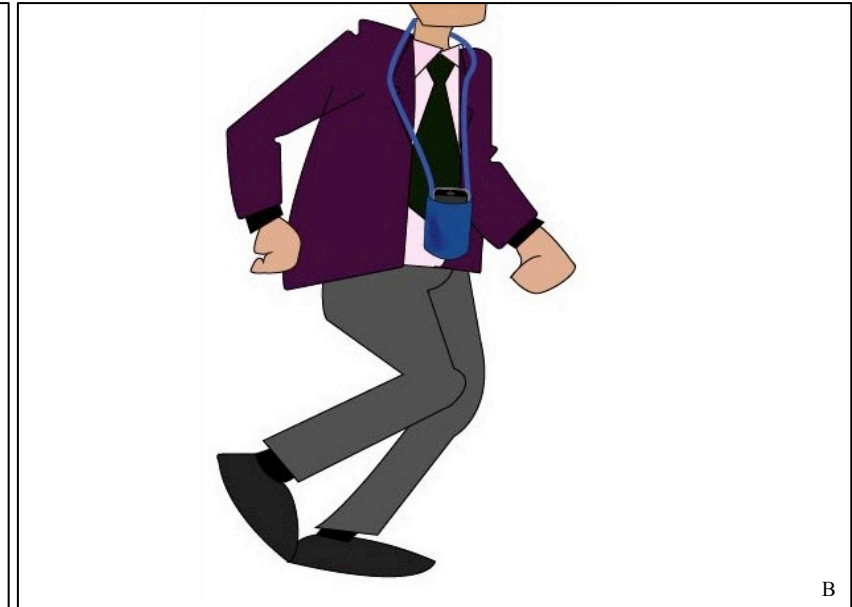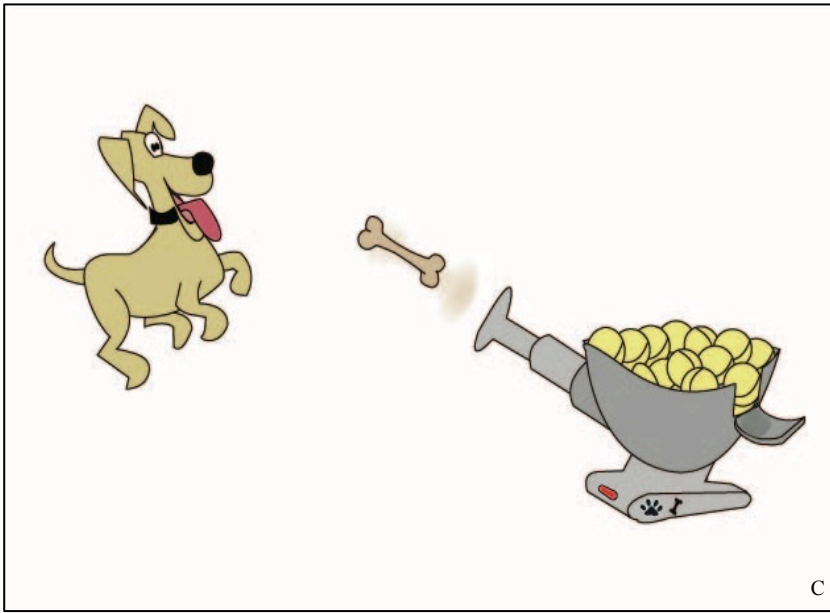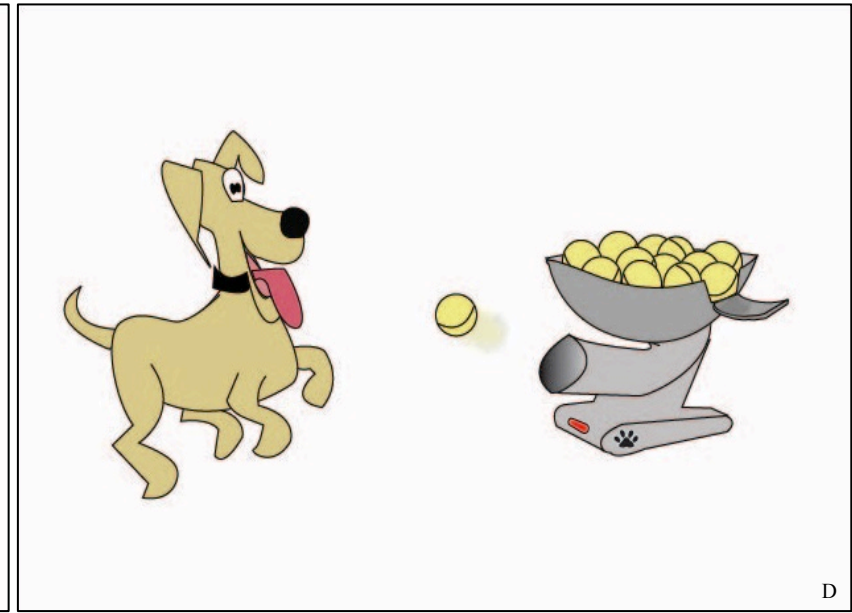

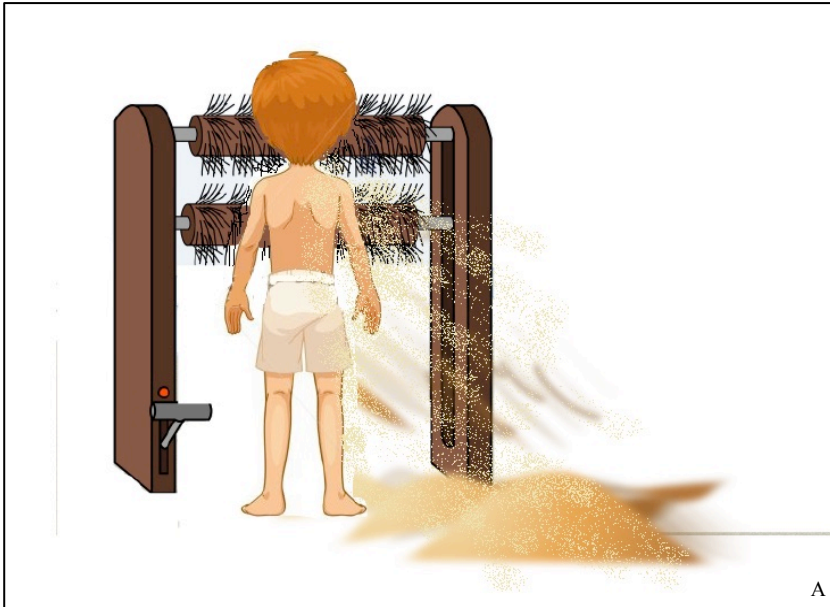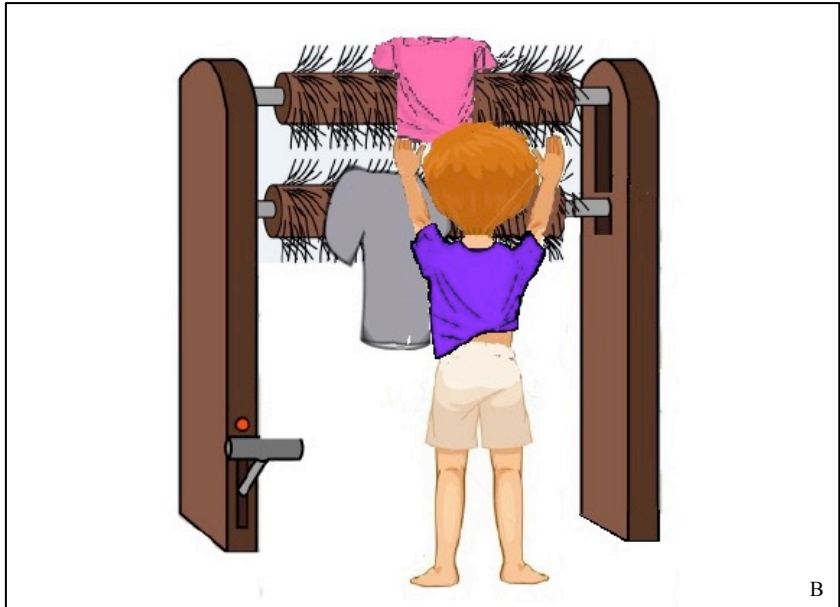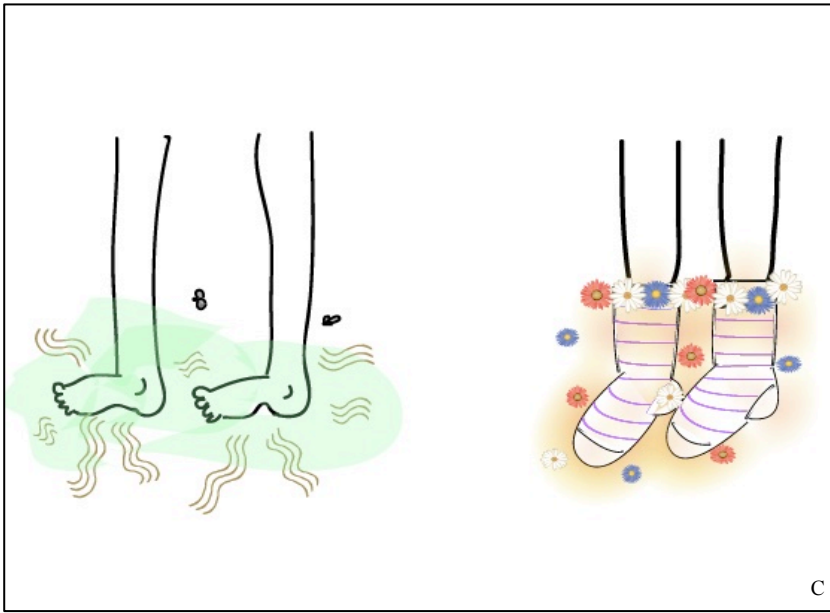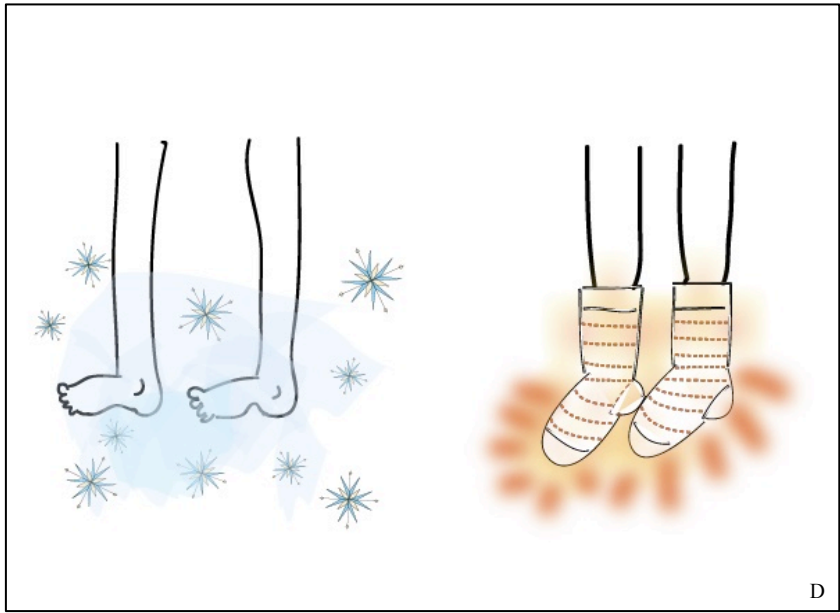



# Set 4

Reading

Max does not want peas in his food.  
He turns on the noak. The noak is used  
to take out peas from food. Max puts  
his food into the noak. The noak takes  
out peas from Max's food.

Bill's hat got wet in the rain. Bill runs to the merl. The merl is used to dry hats. Bill puts his hat on the merl. The merl dries Bill's hat.

Sue is in the kitchen and the garbage is mixed up. Sue takes out the seef. The seef is used to sort garbage. Sue puts the garbage into the seef. The seef sorts Sue's garbage.

# Word Choice

seef

1

seaf

2

weef

3

weaf

4

noke

1

loke

2

loak

3

noak

4



burl

1

berl

2

murl

3

merl

4

# Picture Choice

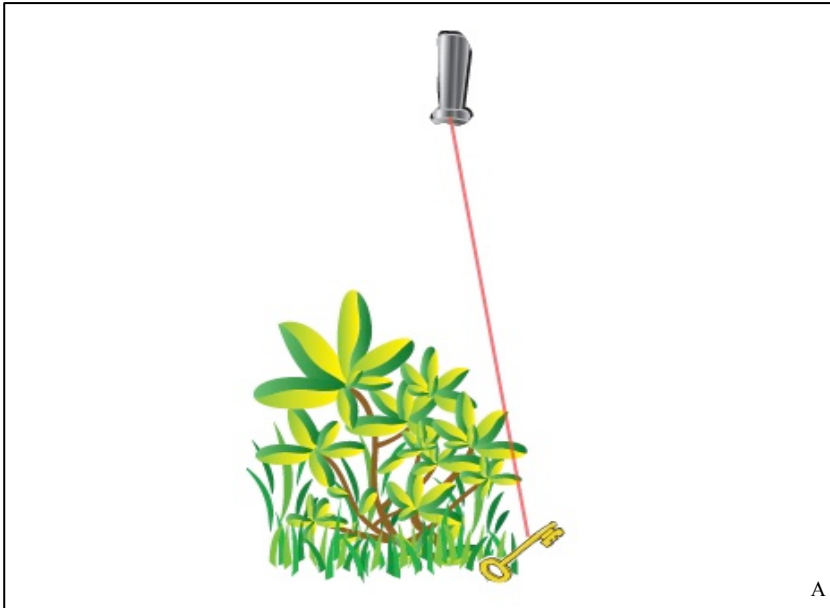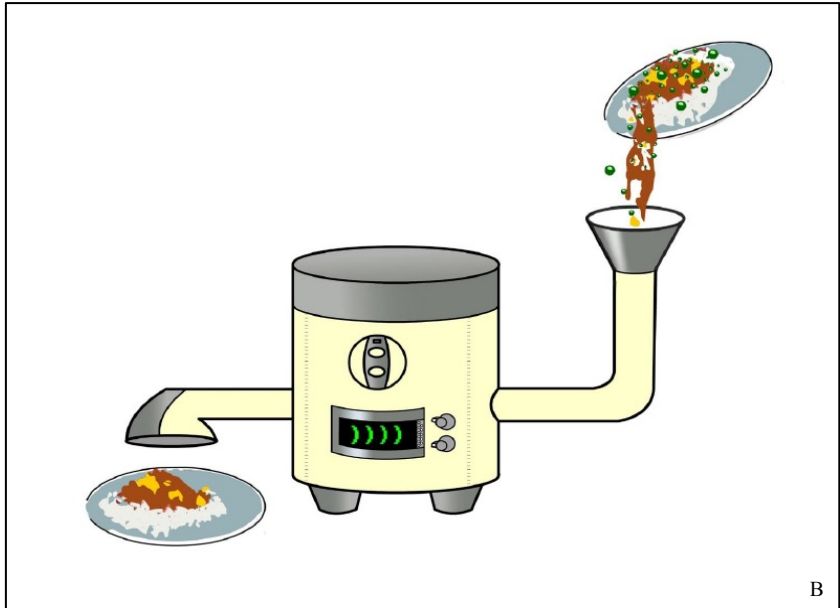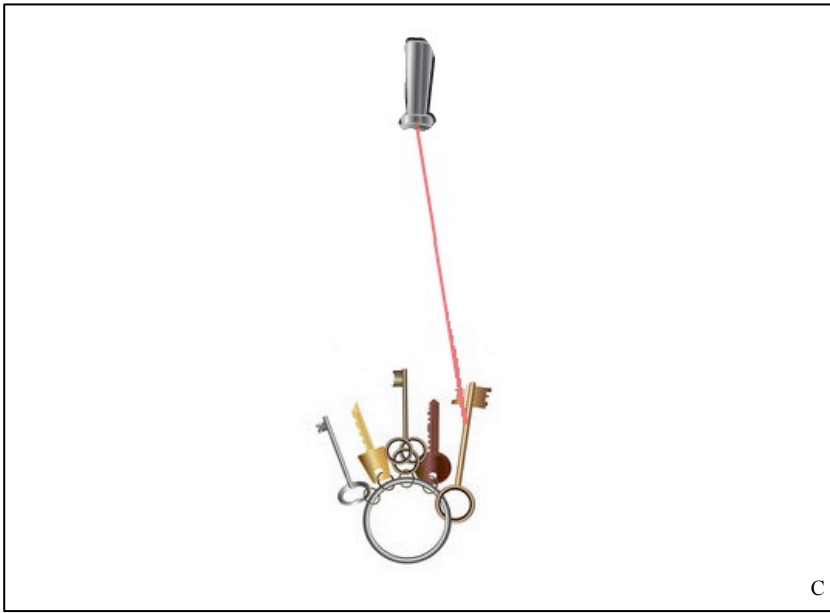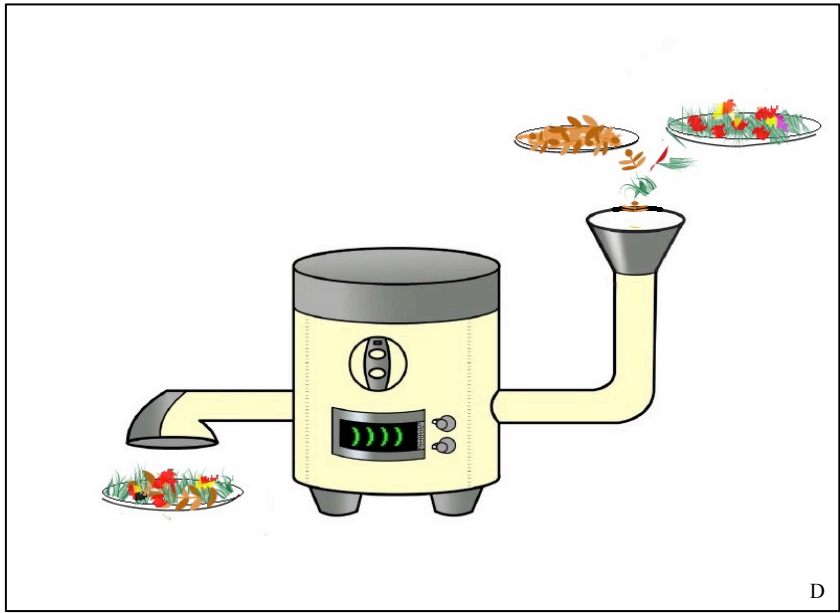

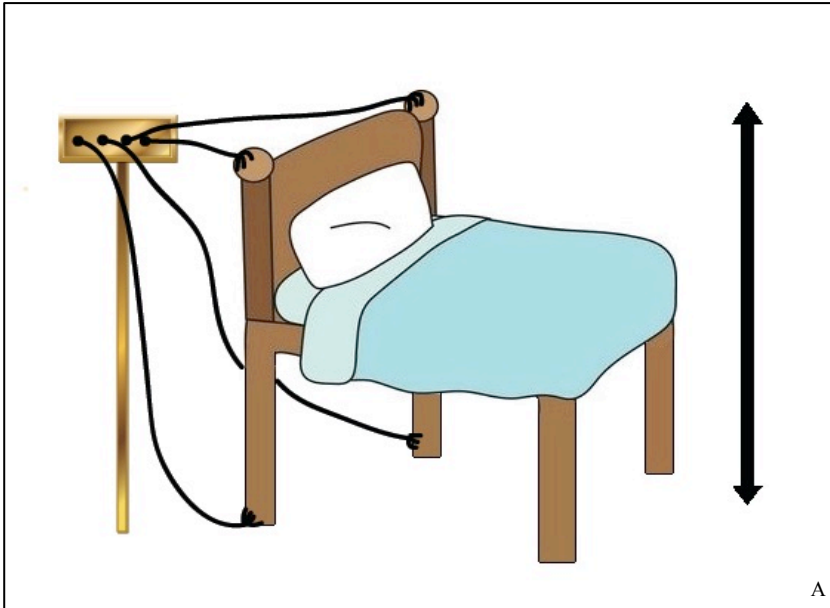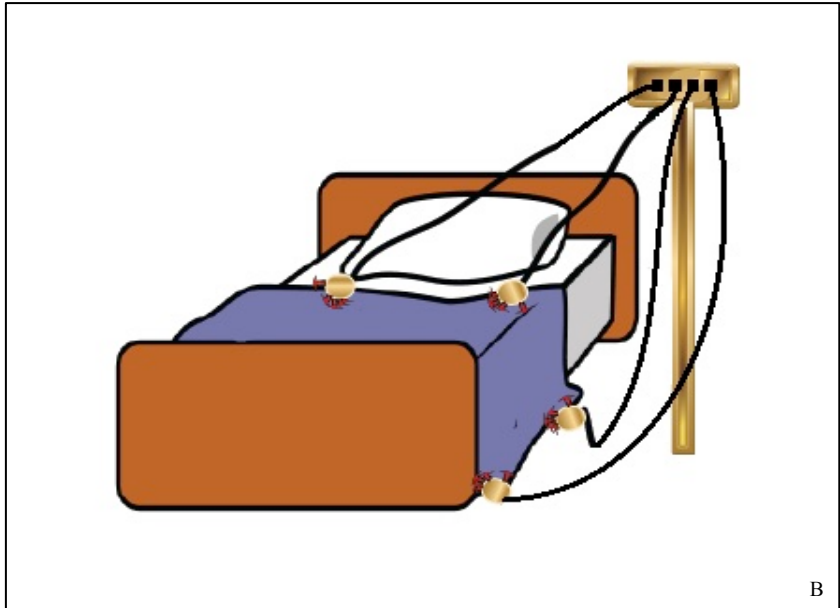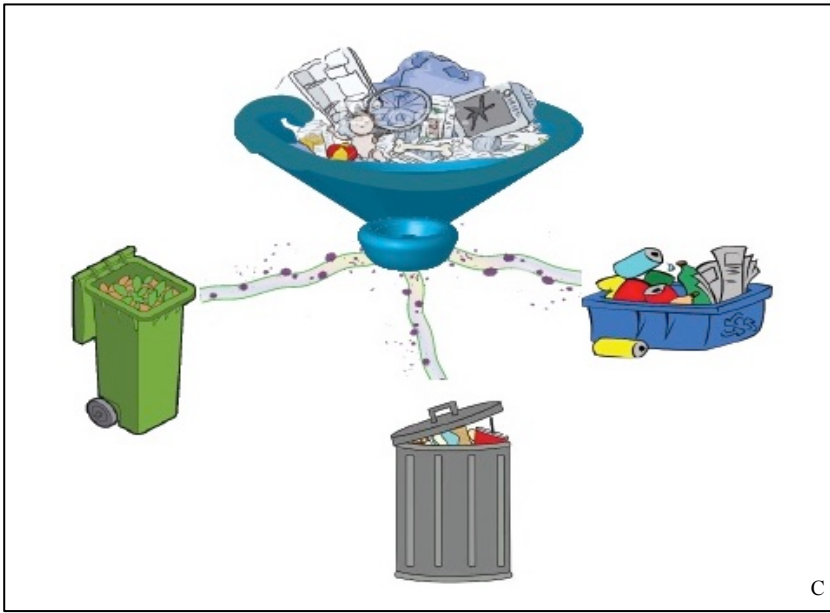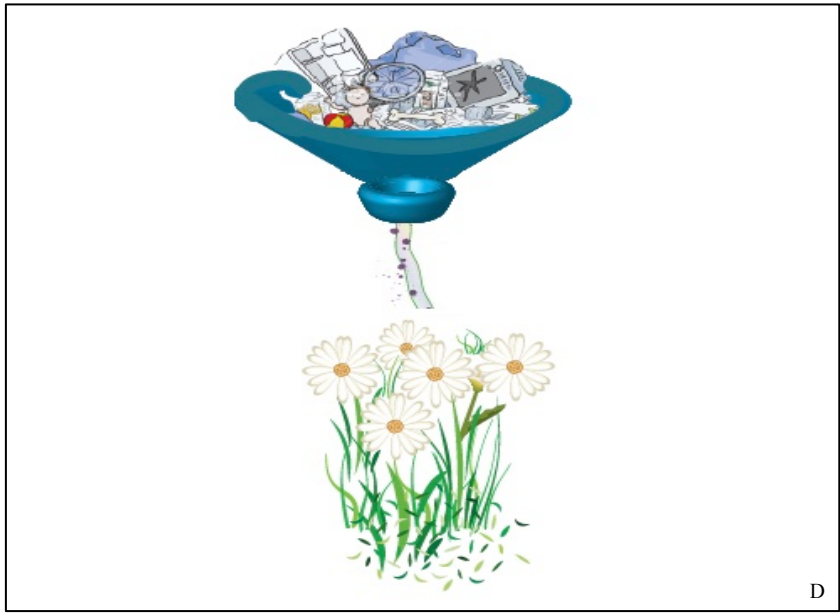

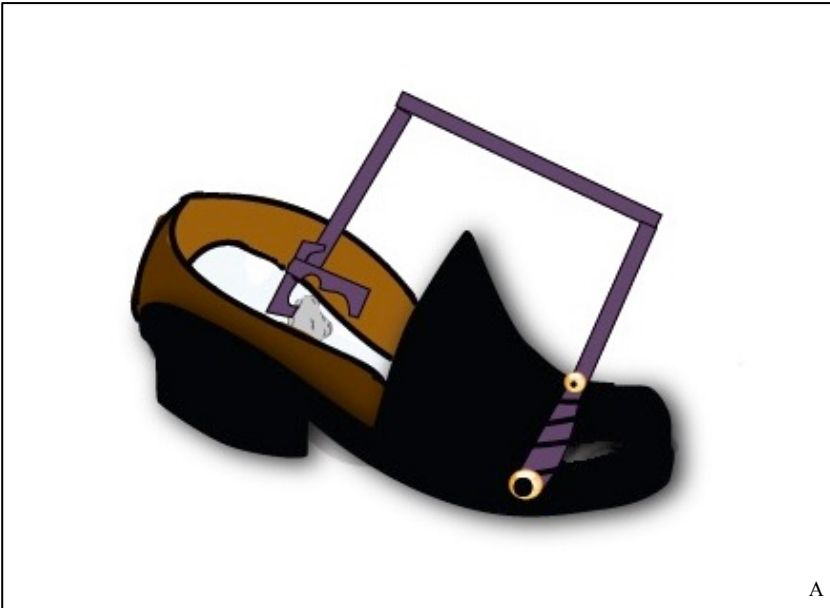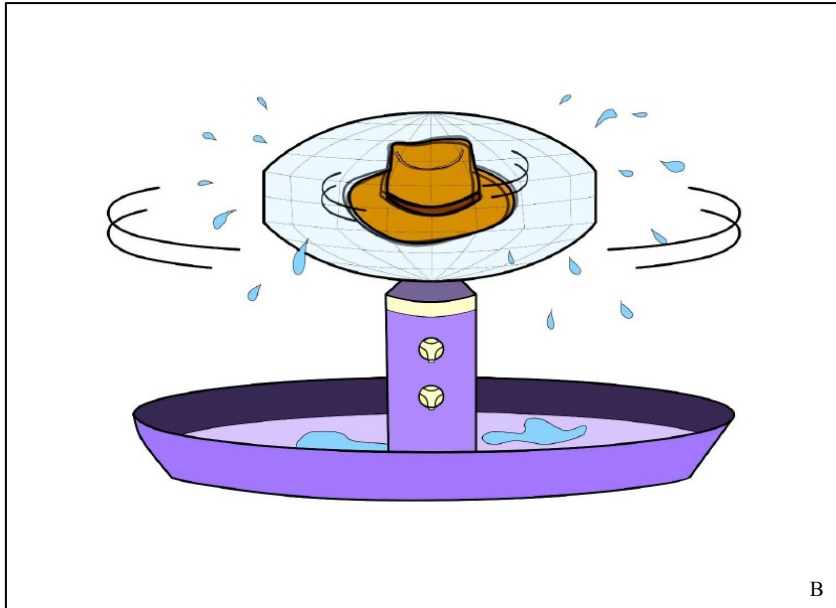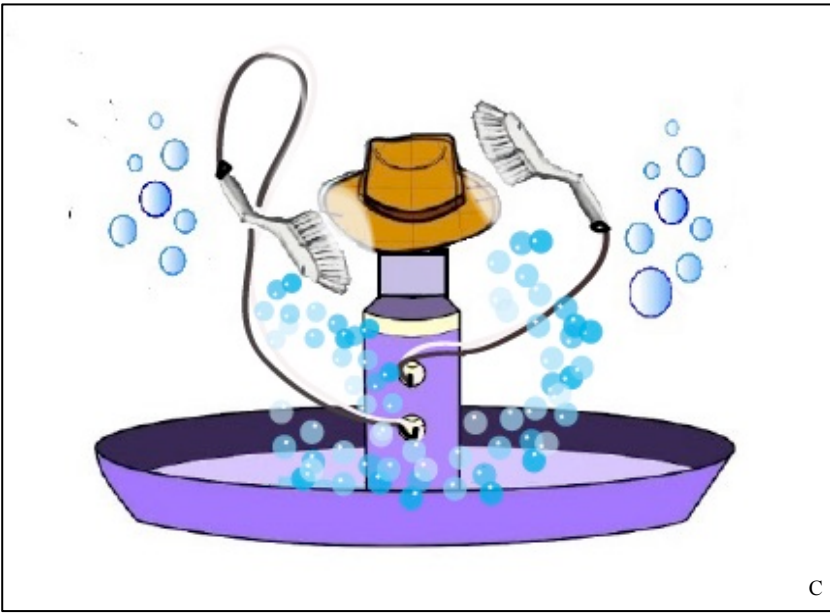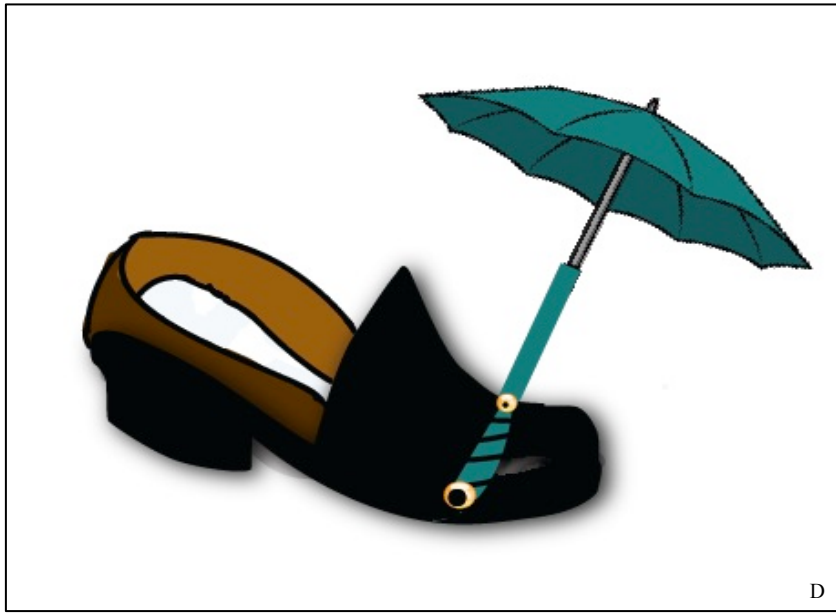

Supplement: Supplementary file 1 [file 1]
