# Supplementary material
Source: publisher figshare collection journal article supplement (https://asha.figshare.com/articles/dataset/_/13877999)

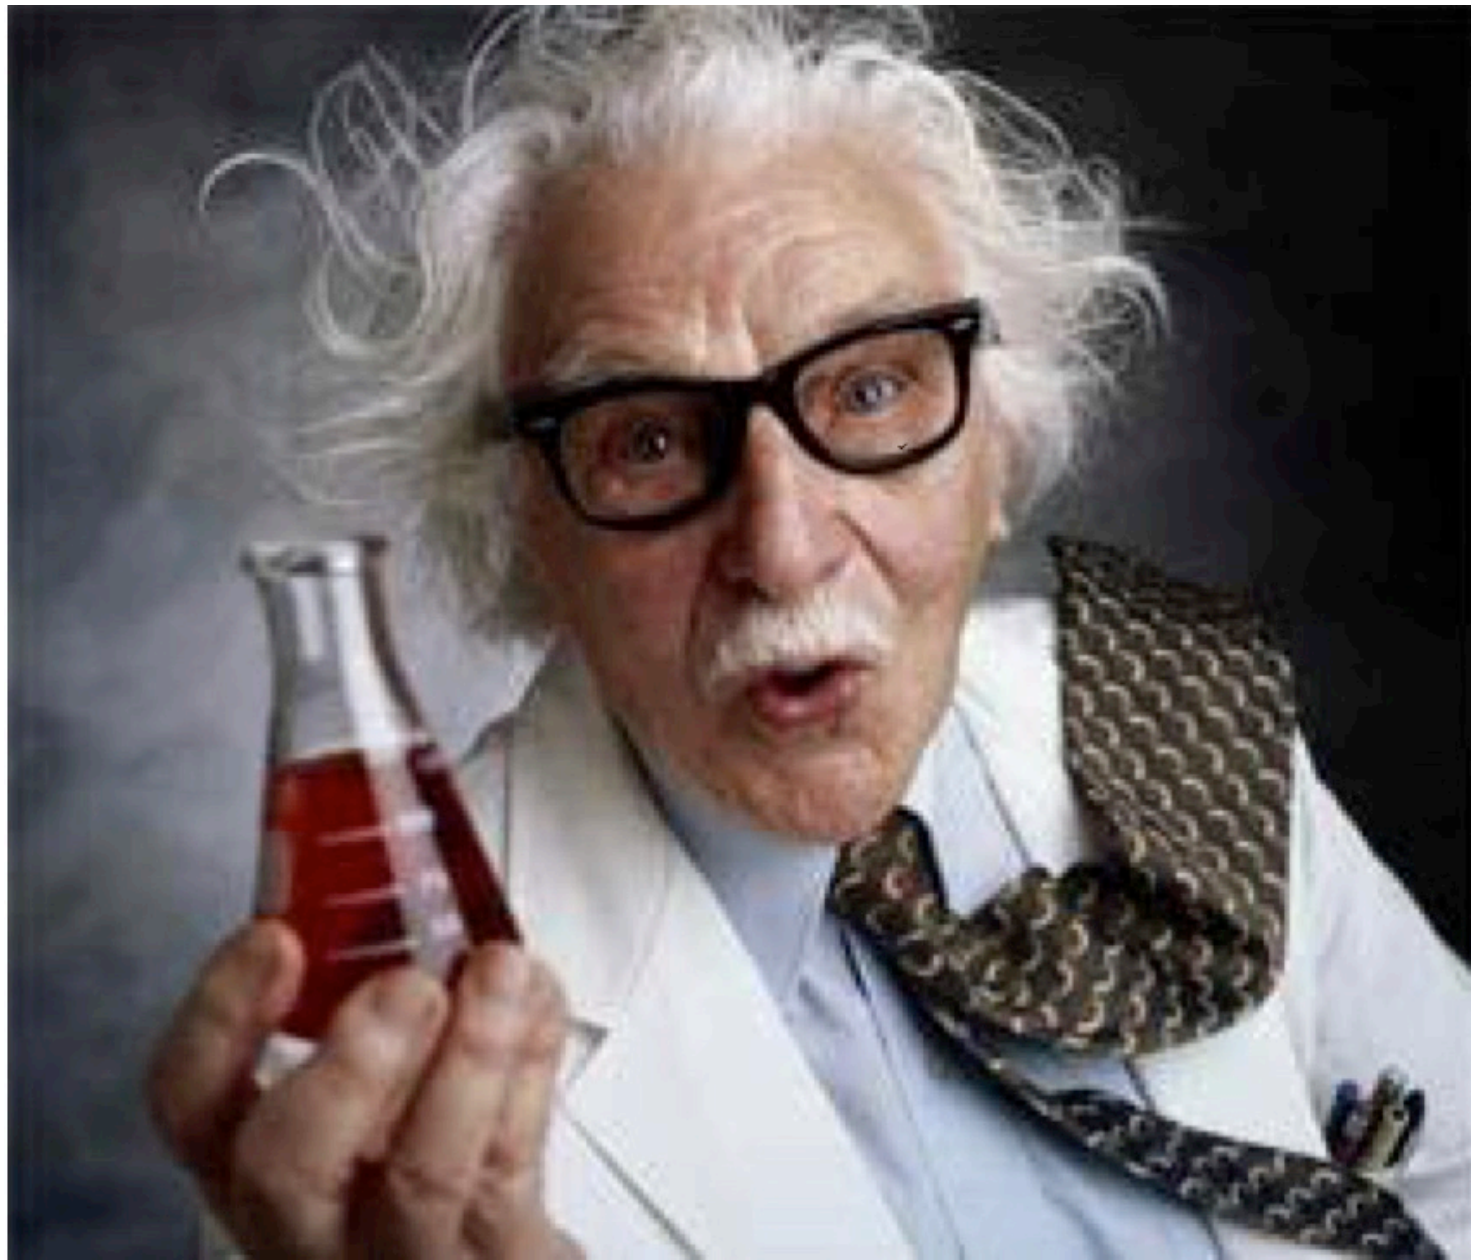

Set 1

Reading

Ben's fish tank is dirty. Ben picks up the veep. The veep is used to clean fish tanks. Ben puts the veep in the fish tank. The veep cleans Ben's fish tank.

Jane is hungry, but the bread is not toasted. Jane takes out the krig. The krig is used to toast bread. Jane cuts the bread with the krig. The krig toasts Jane's bread.

Nick wants to play a game, but the cards are not mixed. Nick takes out the zaib. The zaib is used to mix cards. Nick puts the cards into the zaib. The zaib mixes Nick's cards.

# Word Choice

pabe

1

paib

2

zabe

3

zaib

4



feep

1

veap

2

feap

3

veep

4

krid

1

crig

2

krig

3

crid

4

# Picture Choice

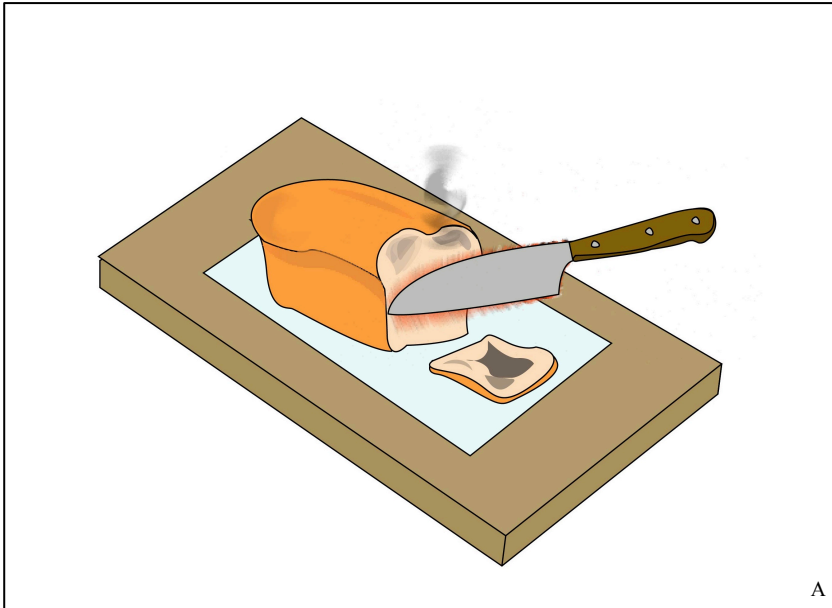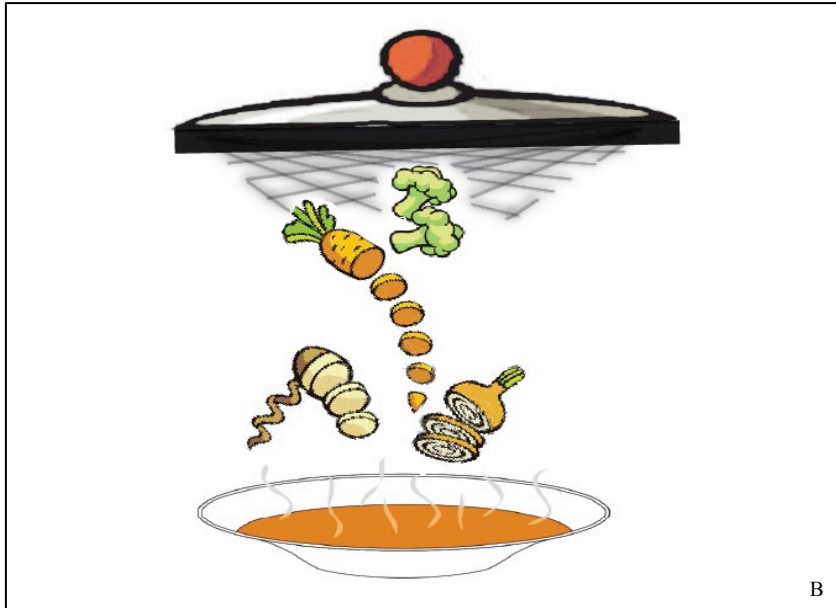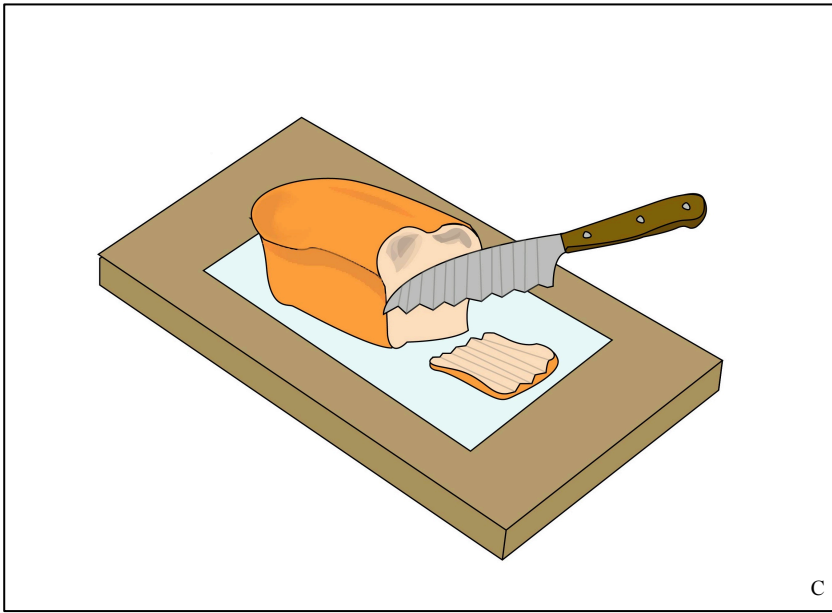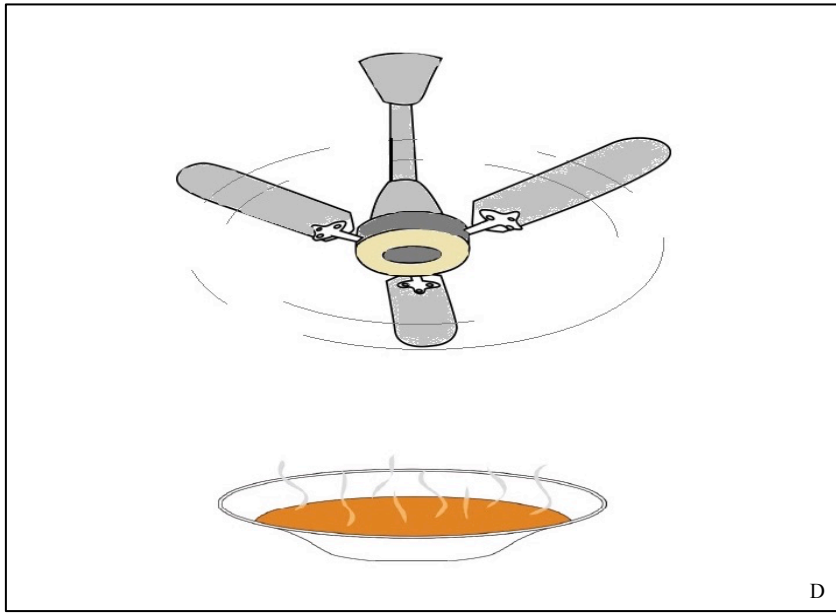

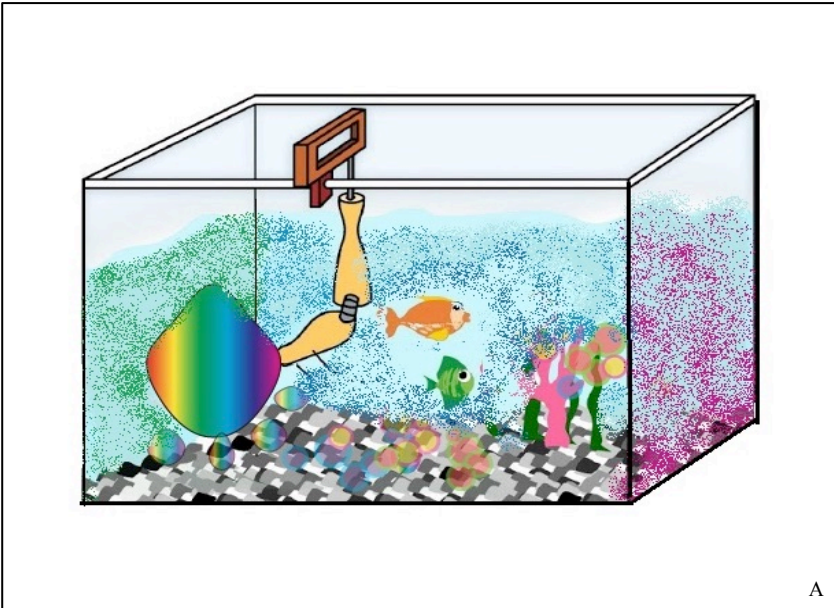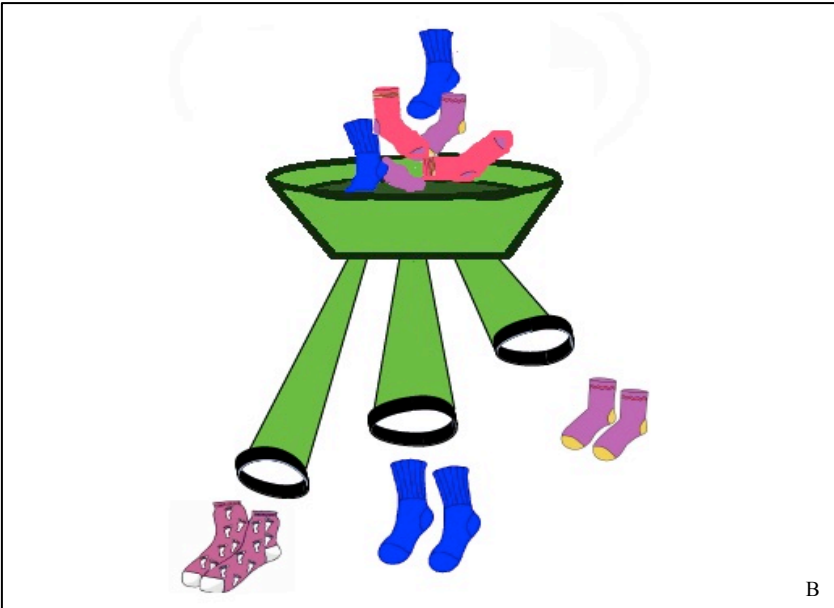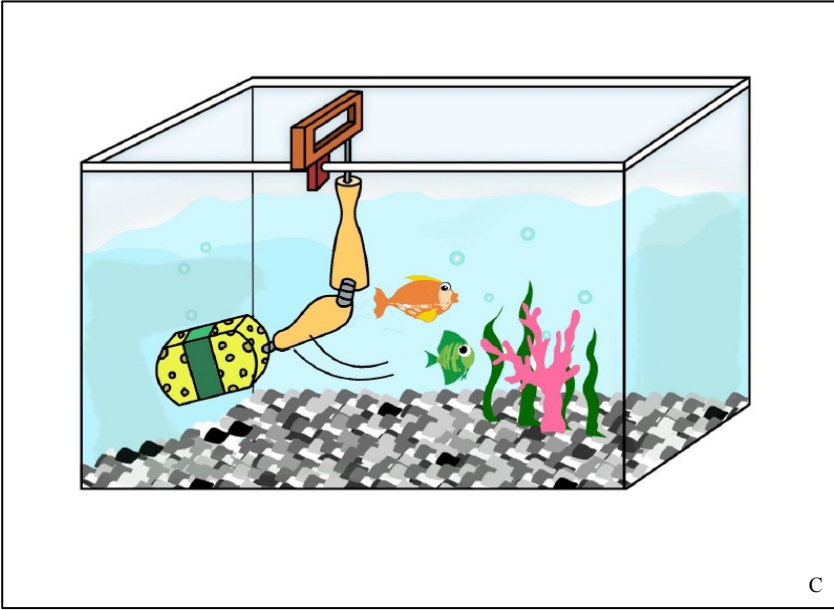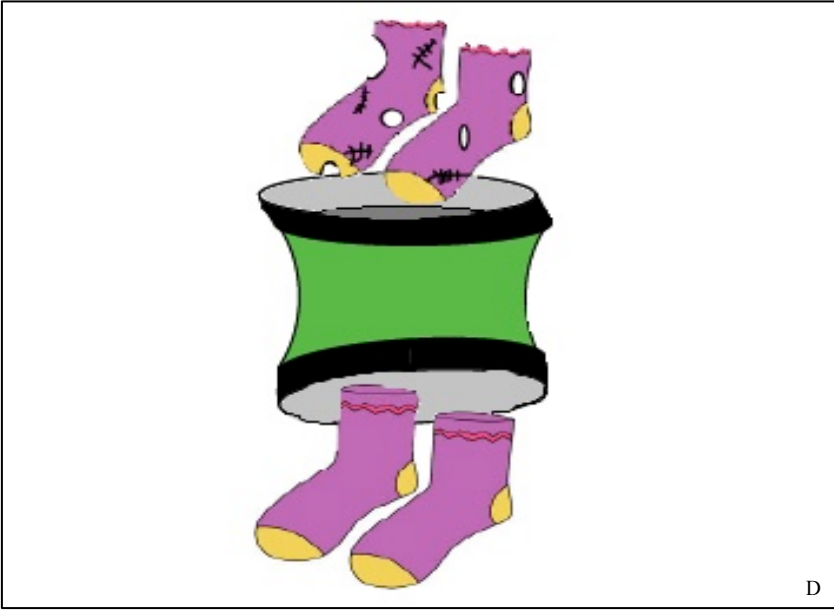

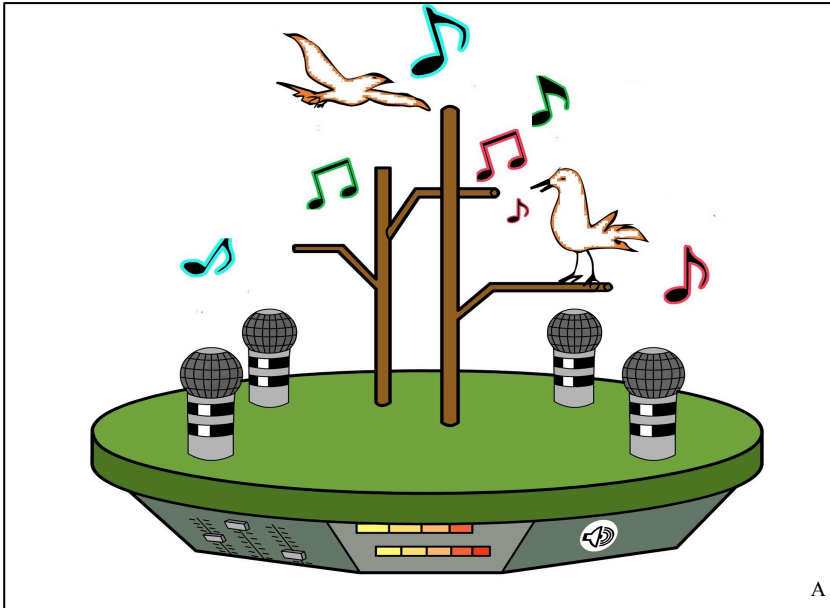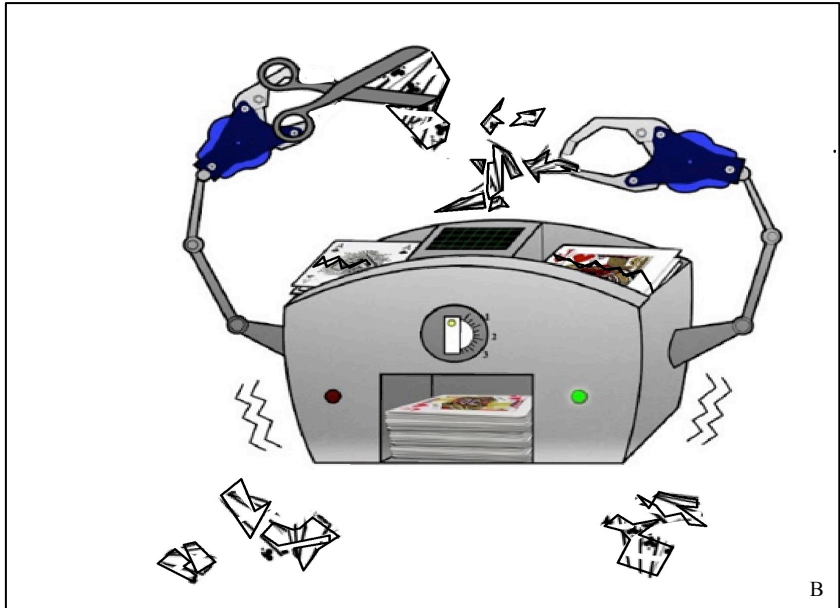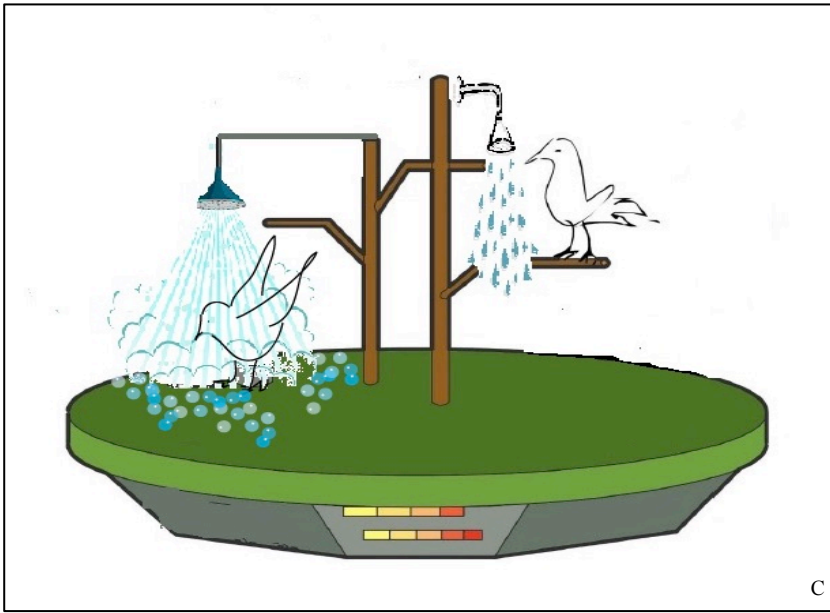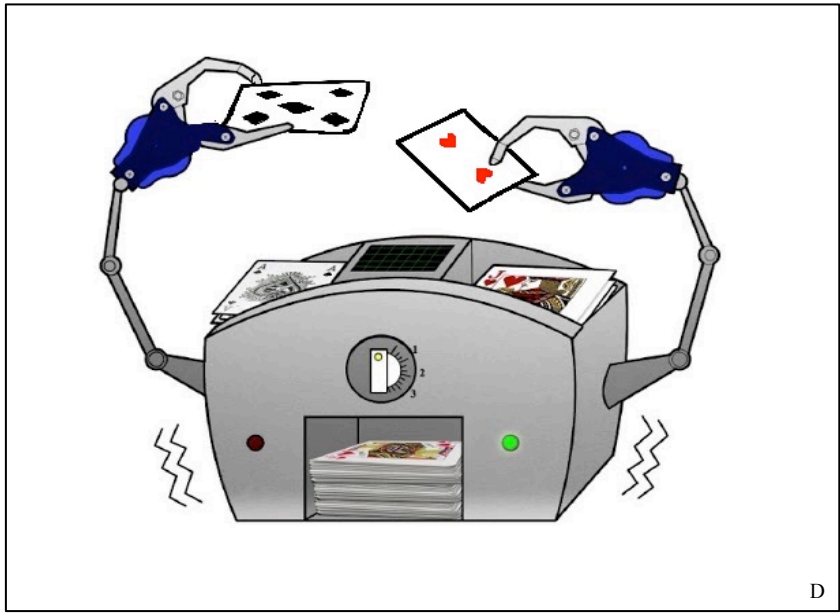

## Set 2

Reading



Jack the cat cannot read the paper.

Jack picks up the lerg. The lerg is used to read the paper. Jack puts the lerg on the paper. The lerg helps Jack read the paper.

Anne has an orange but no juice. Anne looks for the cleb. The cleb is used to get juice from oranges. Anne puts the cleb on the orange. The cleb helps Anne get juice from the orange.

Joe forgets one girl's name. Joe turns on the tewd. The tewd is used to remember people's names. Joe puts the tewd near the girl. The tewd helps Joe remember the girl's name.

# Word Choice

klet

1

cleb

2

kleb

3

clet

4

tude

1

mewd

2

tewd

3

mude

4

lurg

1

lerg

2

terg

3

turg

4

# Picture Choice



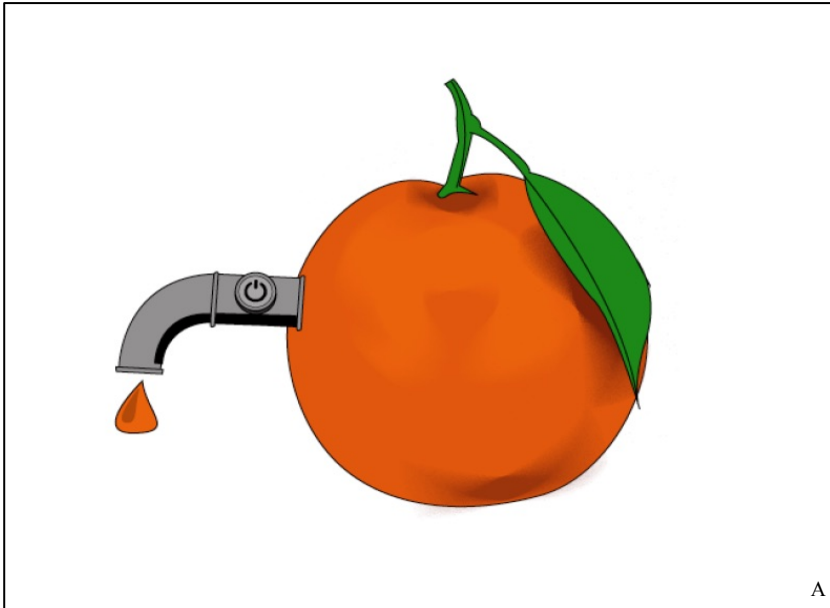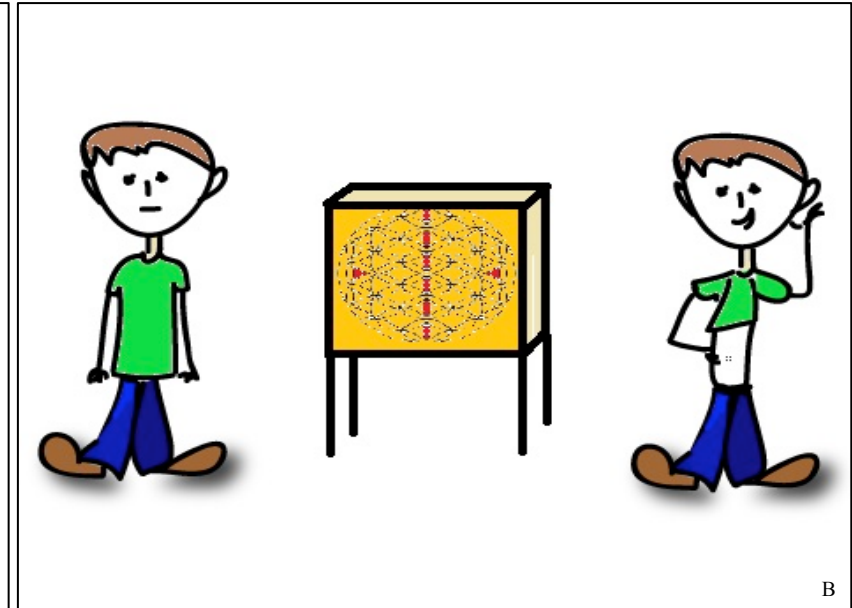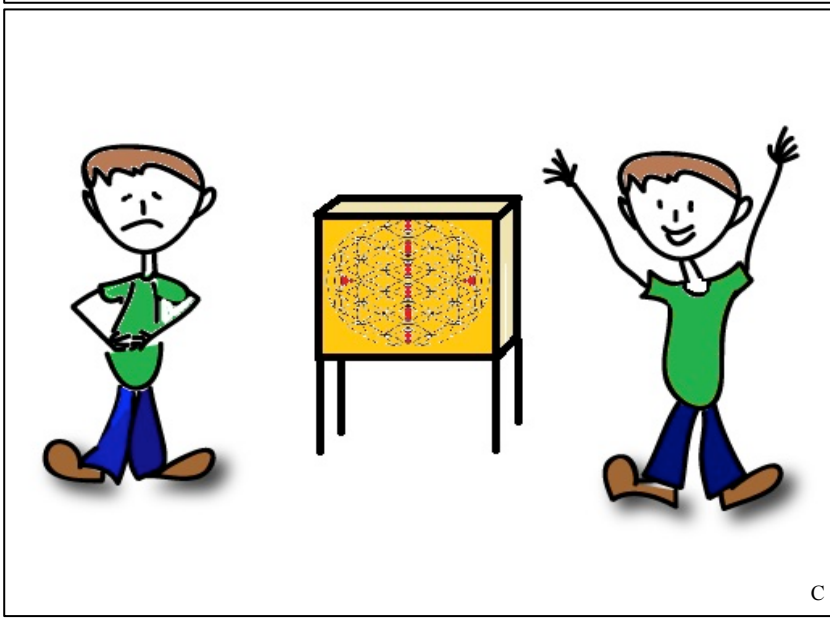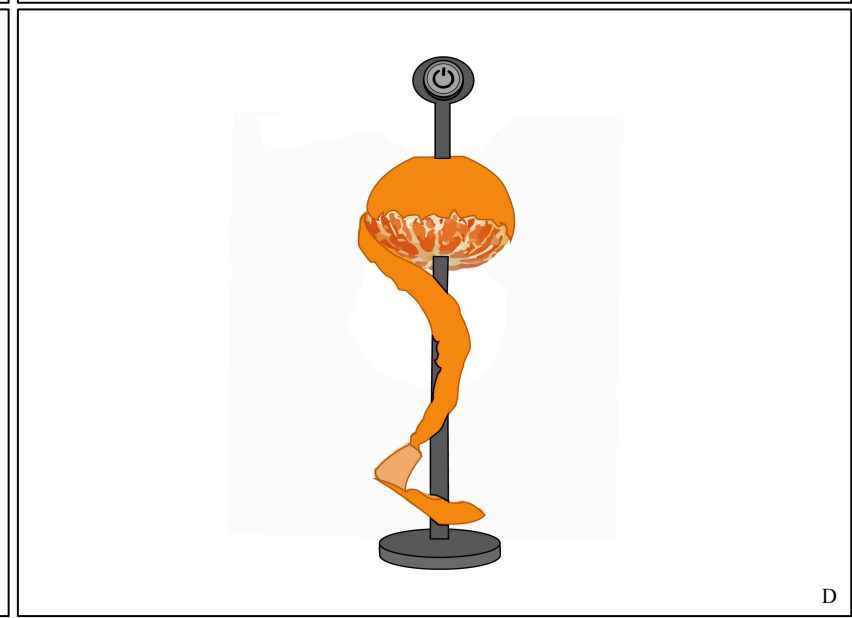

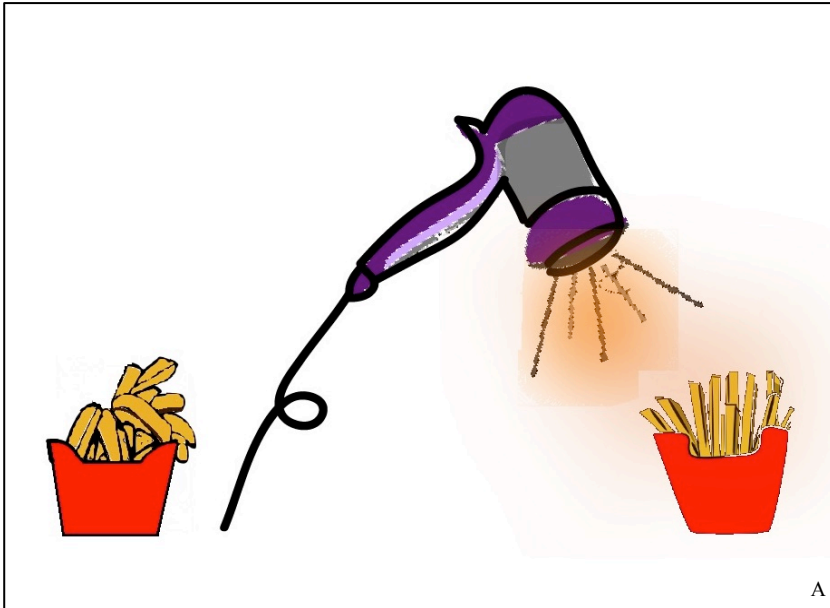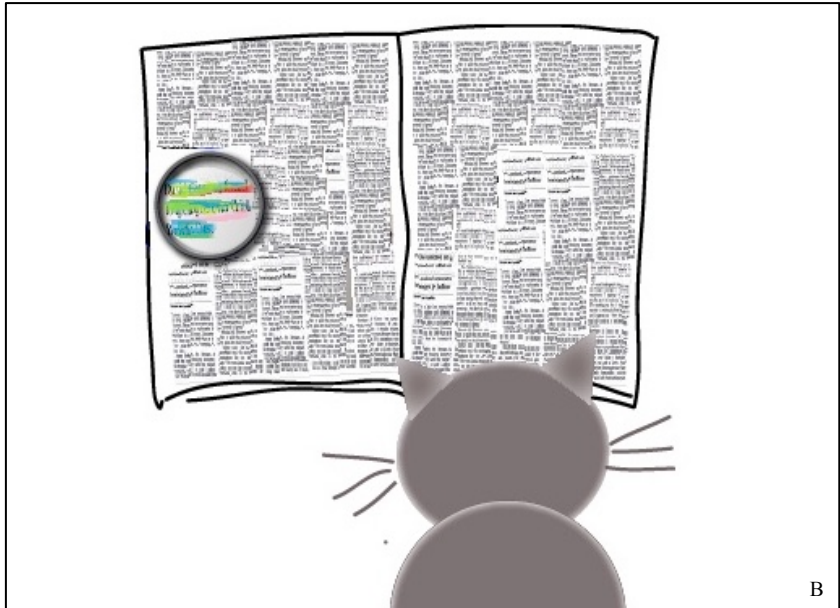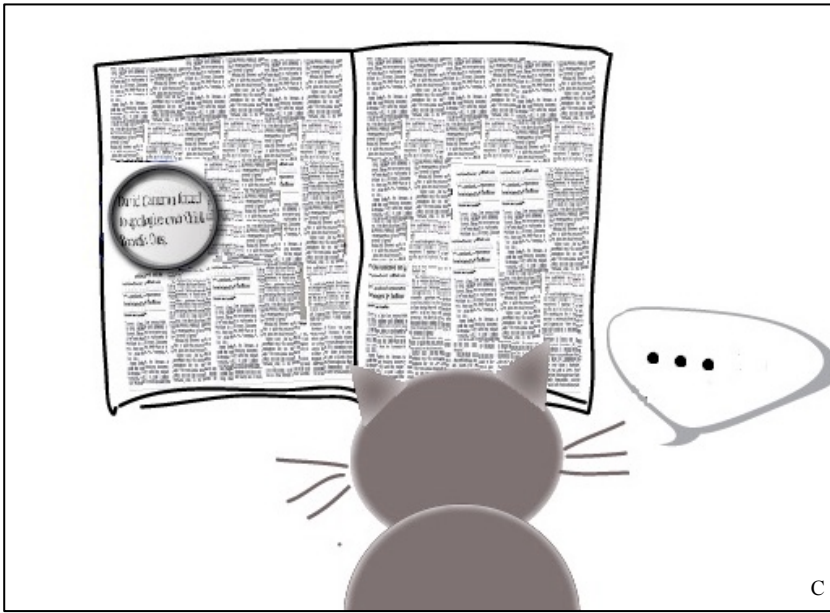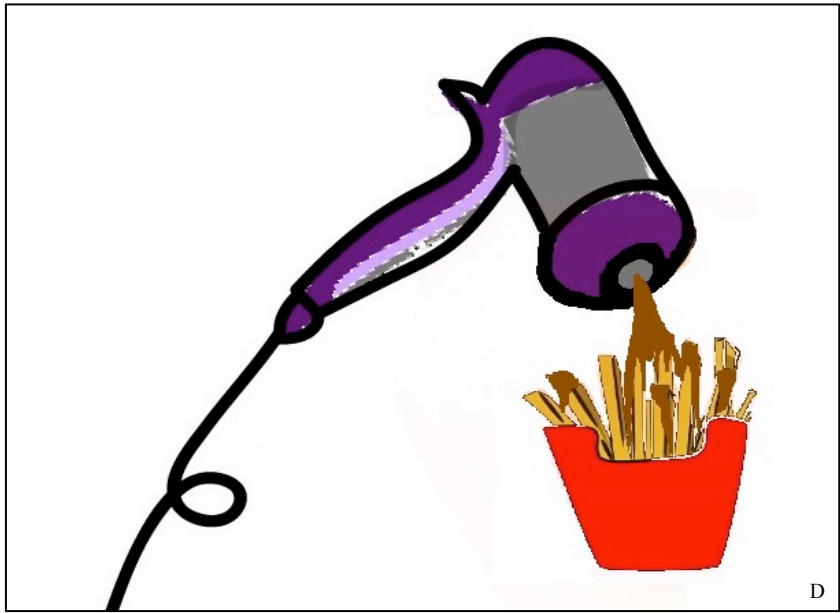

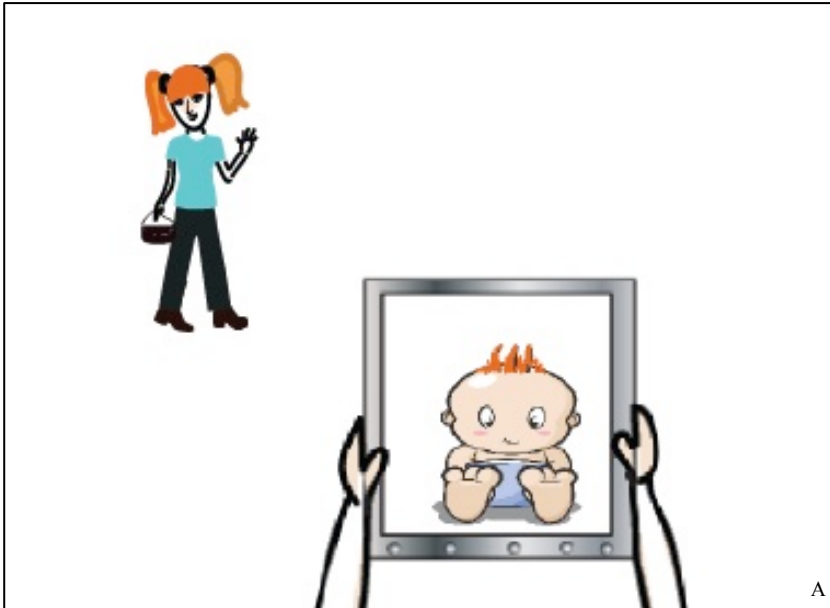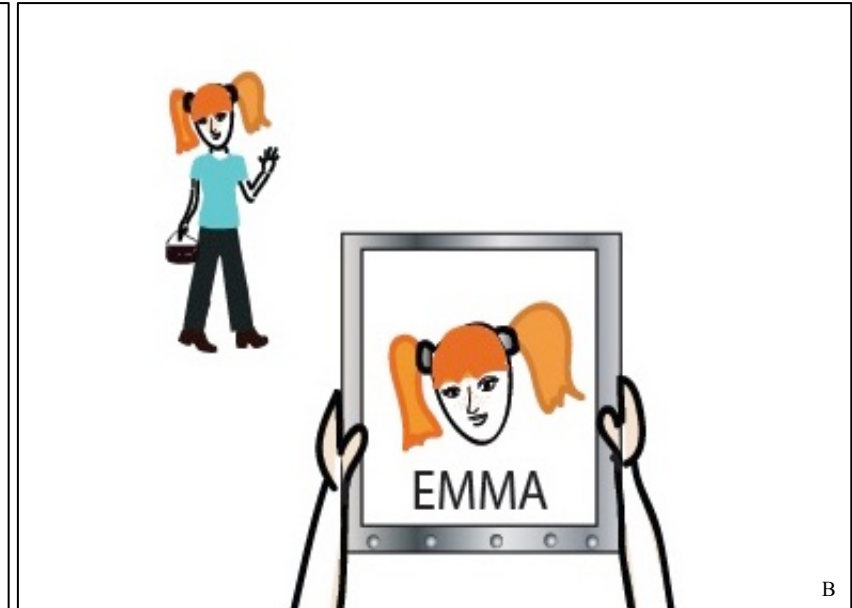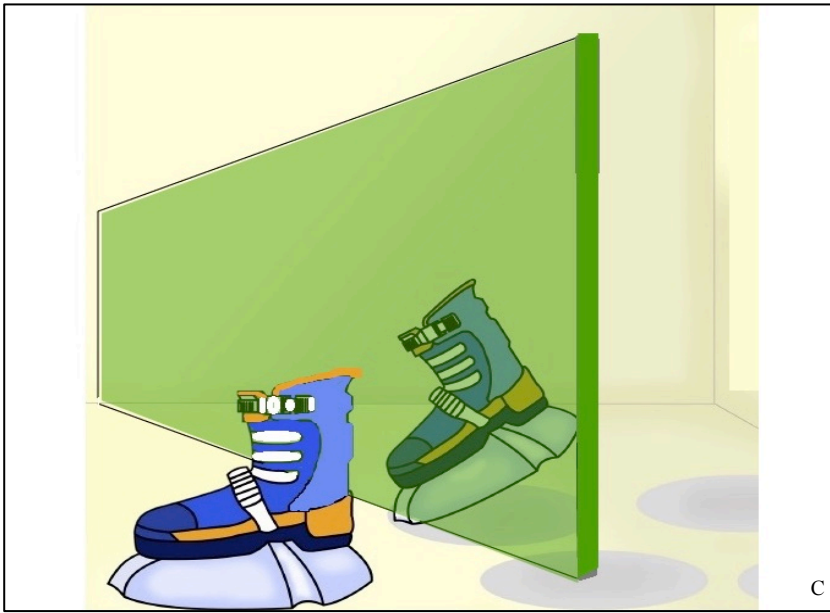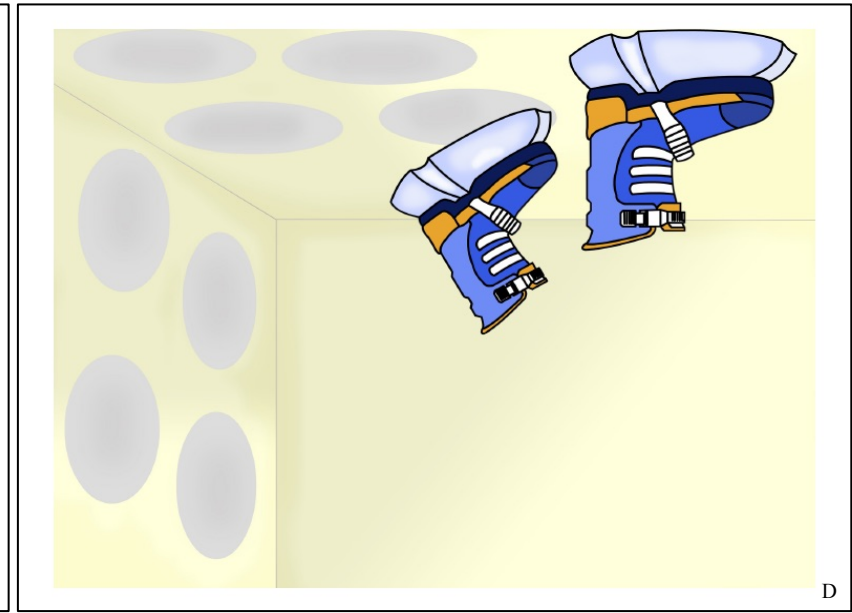

# Set 3

Reading

No one throws balls for Rex the dog.  
Rex passes by the yafe. The yafe is  
used to throw balls. Rex puts the balls  
into the yafe. The yafe throws balls for  
Rex.

Pip has sand all over his body. Pip finds the boap. The boap is used to take the sand away from the body. Pip puts his body near the boap. The boap takes the sand off Pip's body.

Pam's flowers look dull. Pam takes out the hule. The hule is used to make flowers look nice. Pam moves the hule over the flowers. The hule makes Pam's flowers look nice.



# Word Choice

yafe

1

vaif

2

yaif

3

vafe

4

boap

1

jope

2

joap

3

bope

4

zewl

1

hewl

2

zule

3

hule

4

# Picture Choice

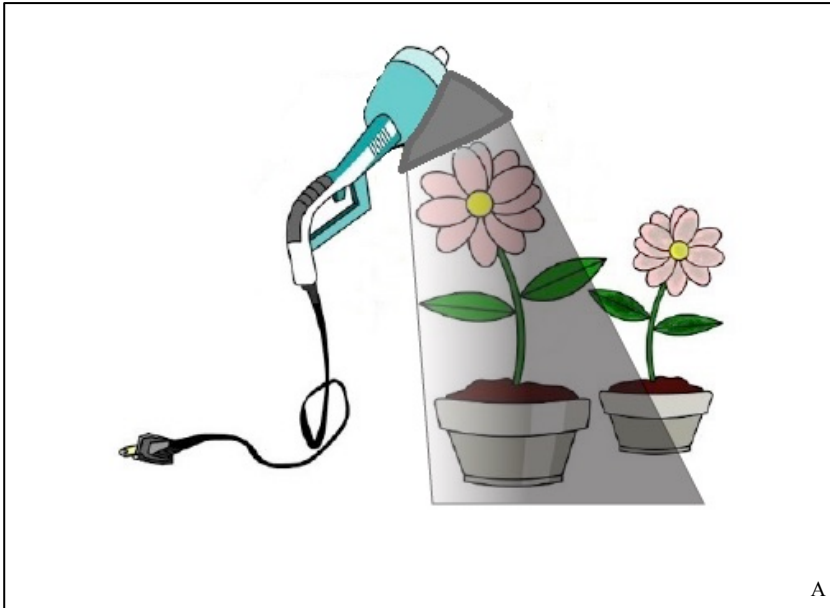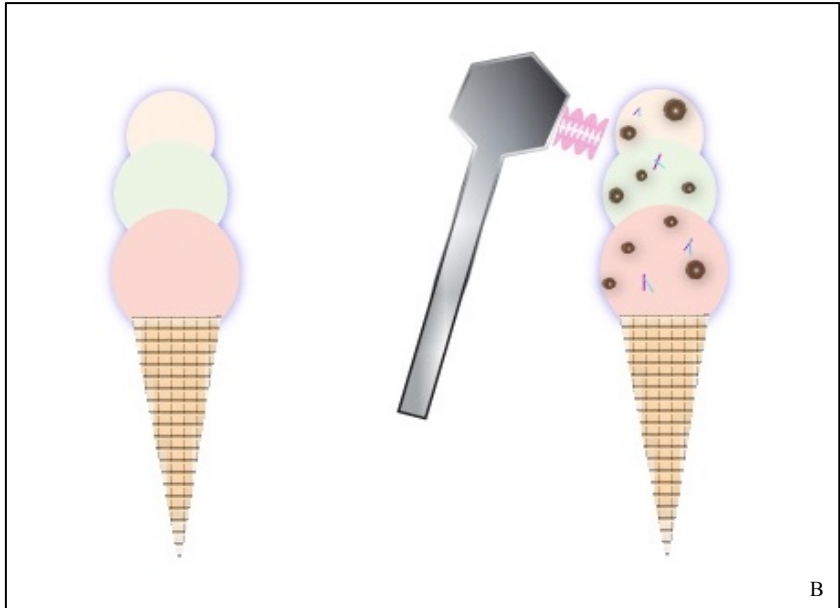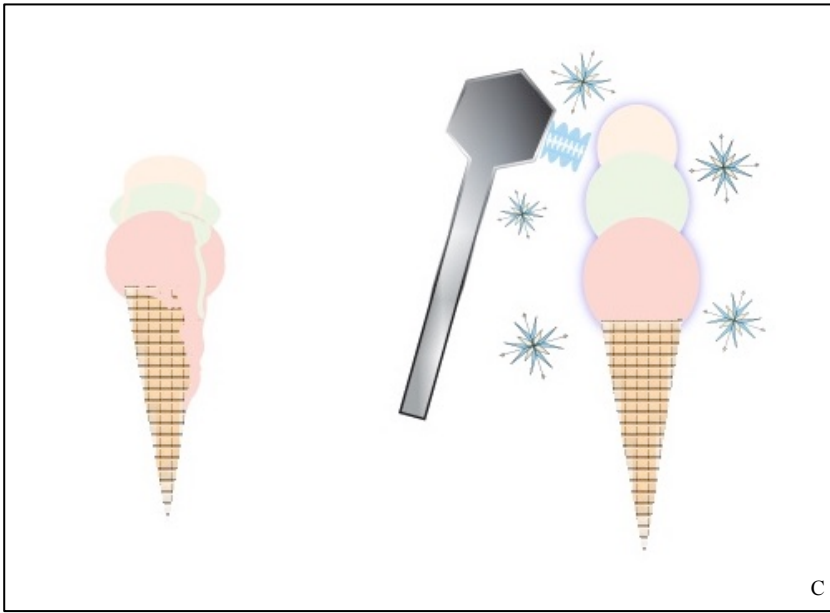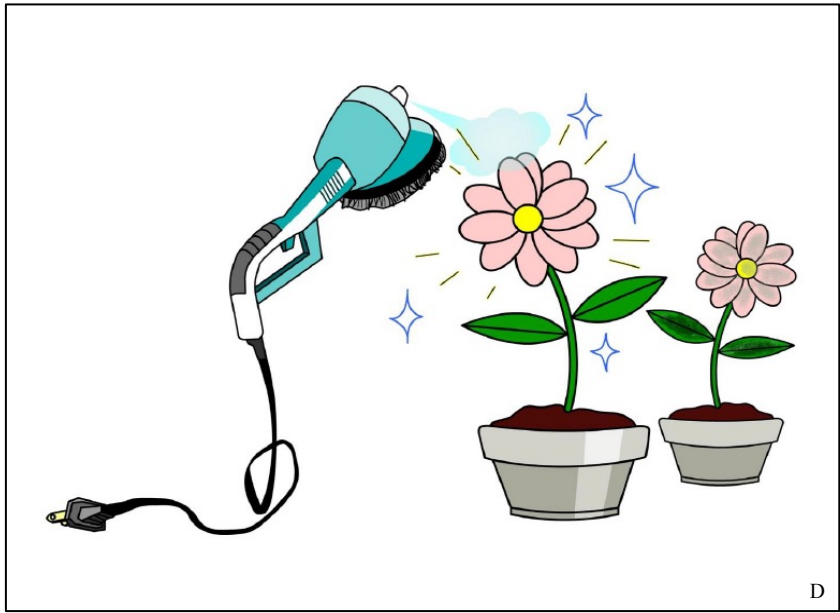

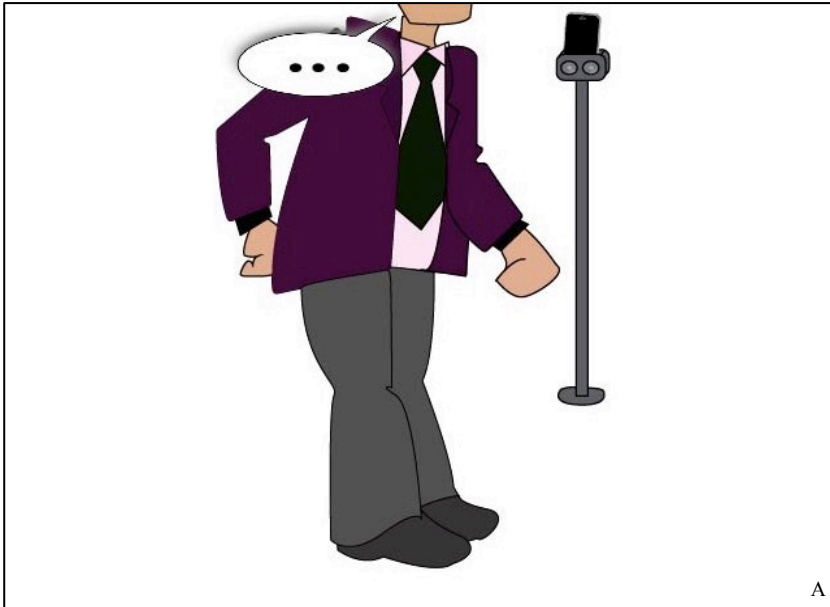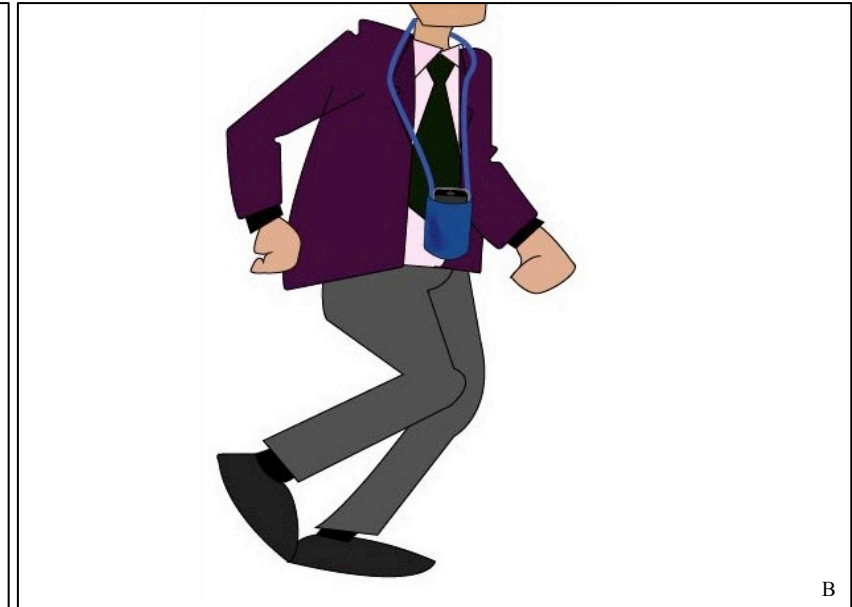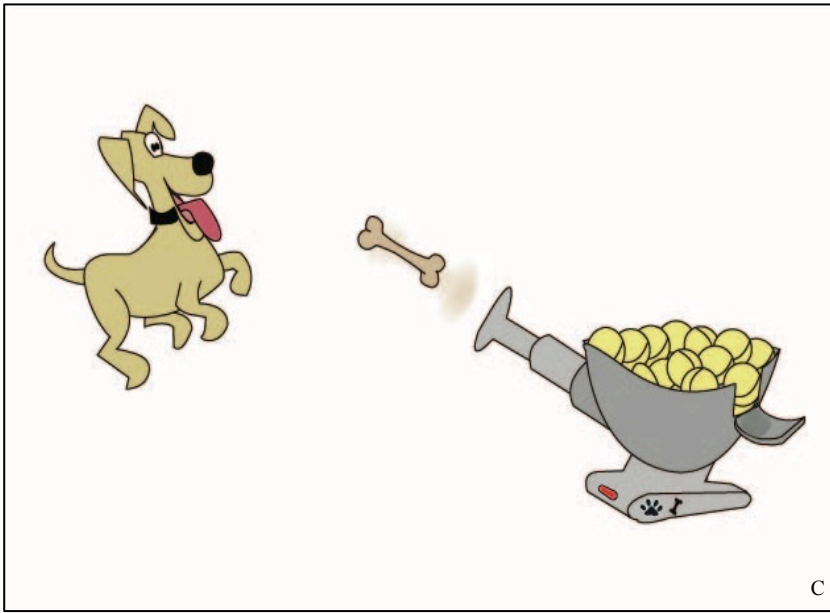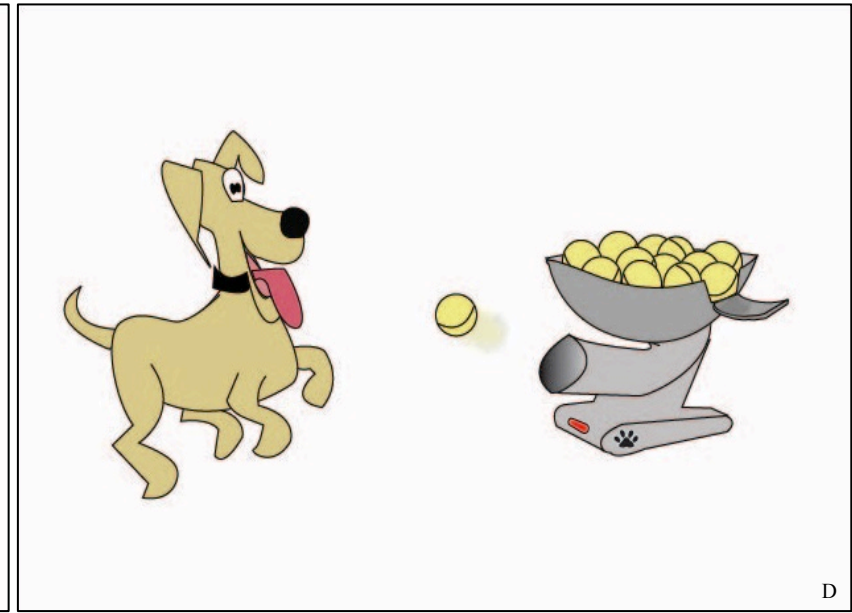

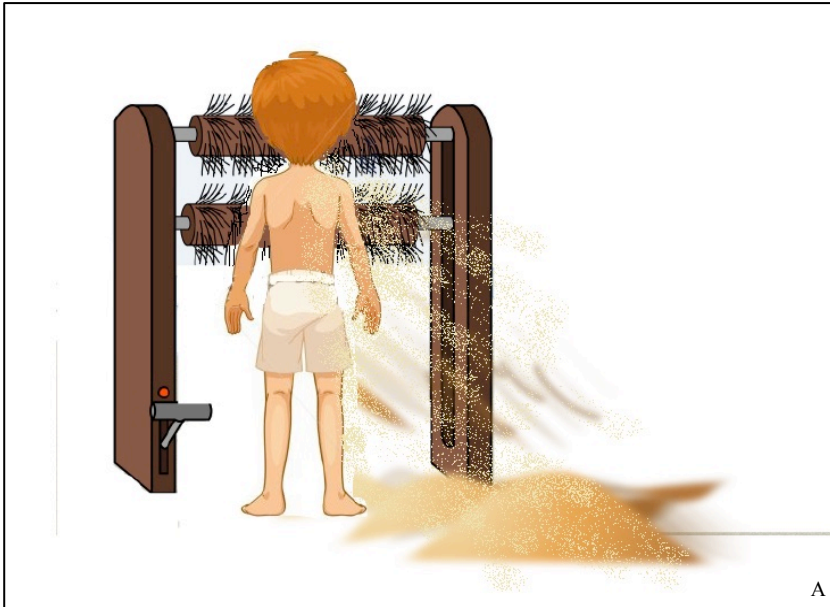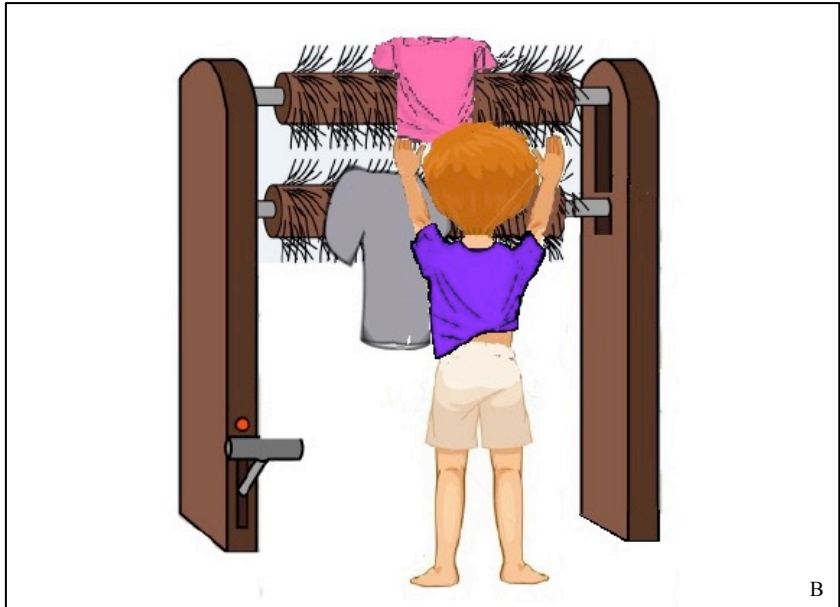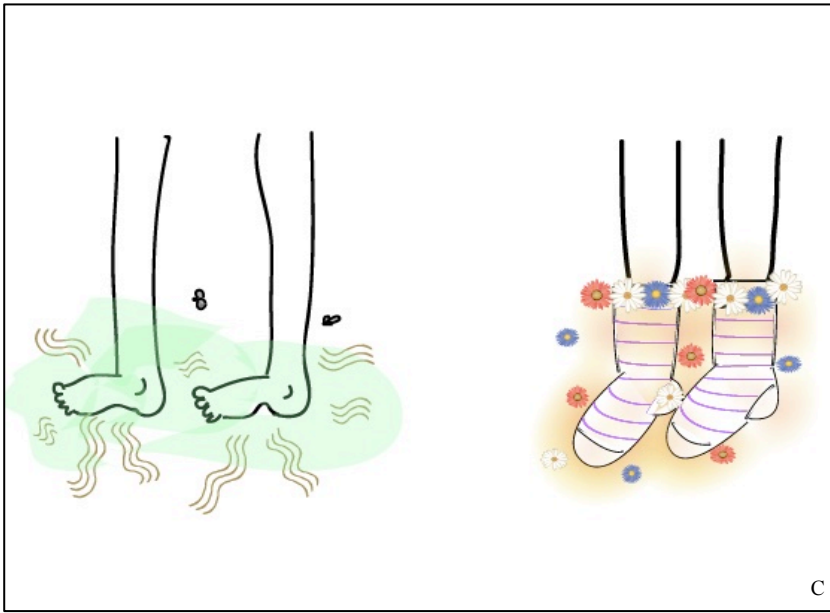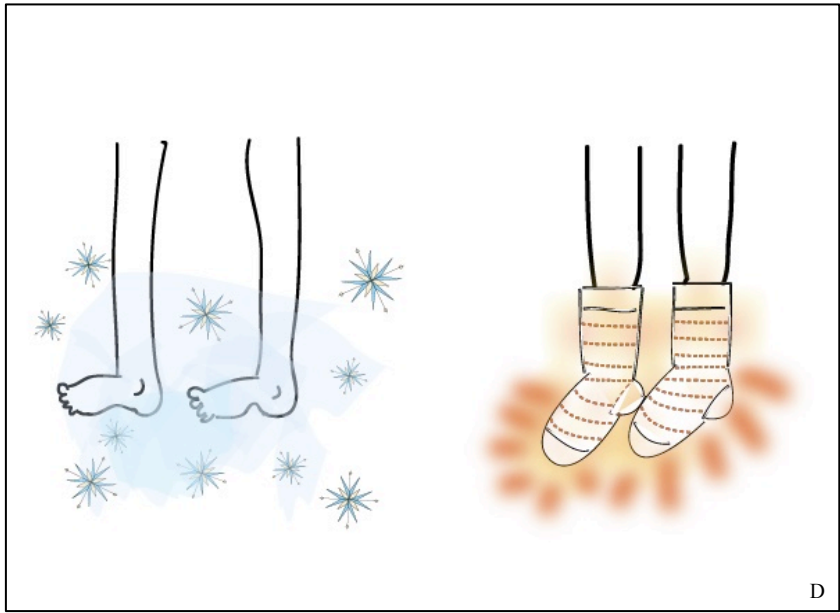



# Set 4

Reading

Max does not want peas in his food.  
He turns on the noke. The noke is used  
to take out peas from food. Max puts  
his food into the noke. The noke takes  
out peas from Max's food.

Bill's hat got wet in the rain. Bill runs to the murl. The murl is used to dry hats. Bill puts his hat on the murl. The murl dries Bill's hat.

Sue is in the kitchen and the garbage is mixed up. Sue takes out the seaf. The seaf is used to sort garbage. Sue puts the garbage into the seaf. The seaf sorts Sue's garbage.

# Word Choice

seef

1

seaf

2

weef

3

weaf

4

noke

1

loke

2

loak

3

noak

4



burl

1

berl

2

murl

3

merl

4

# Picture Choice

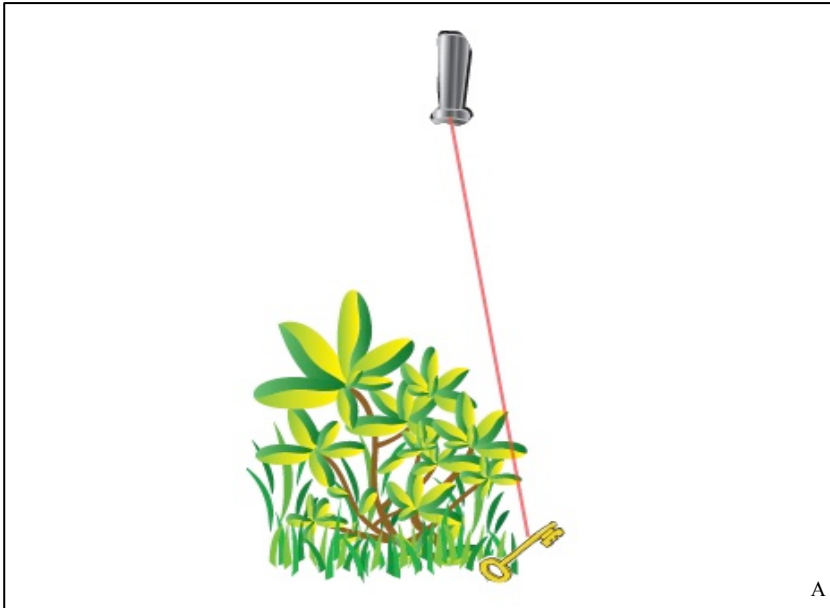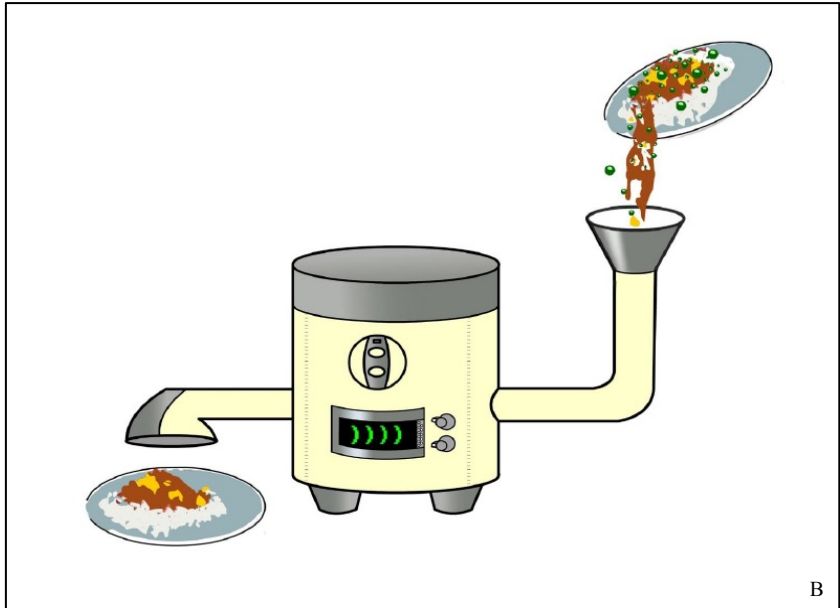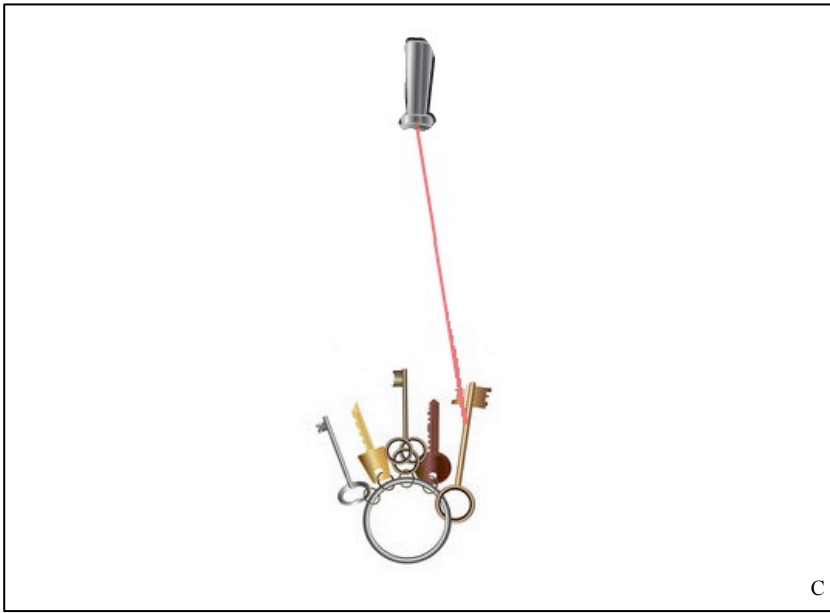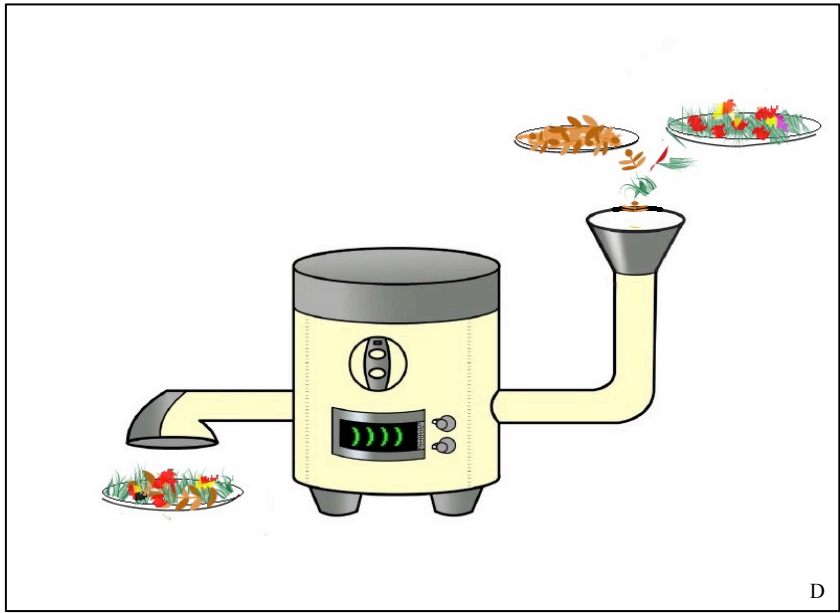

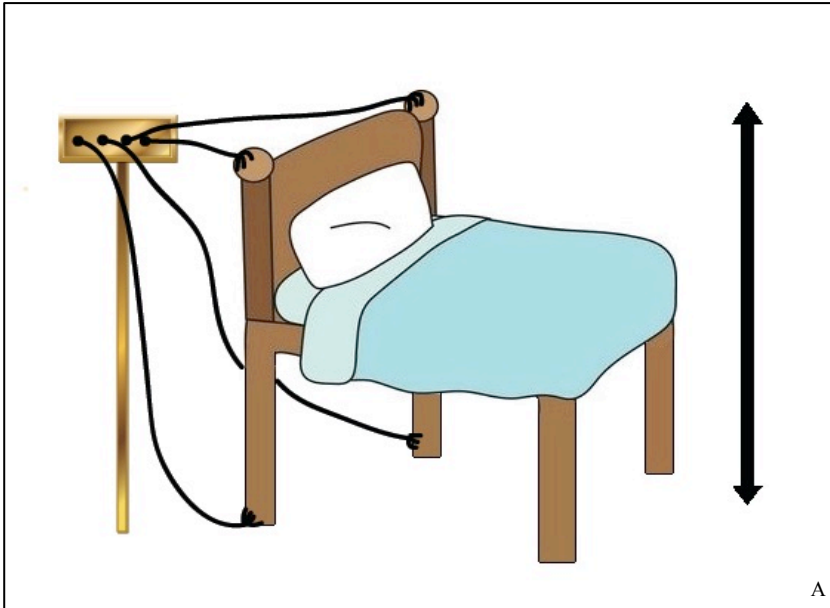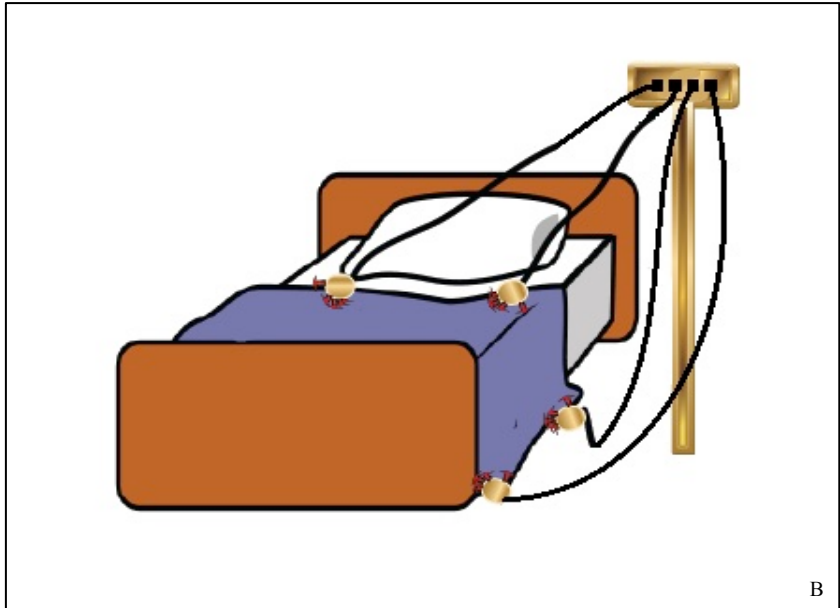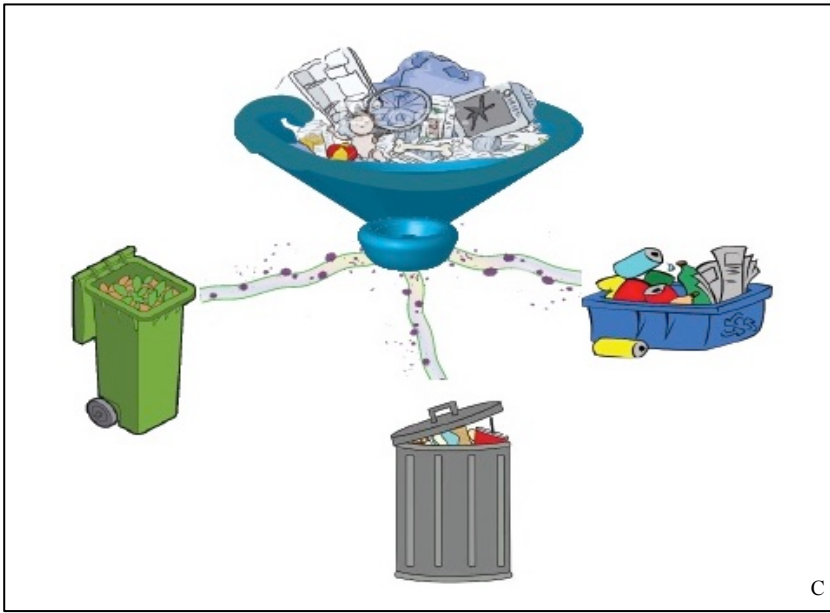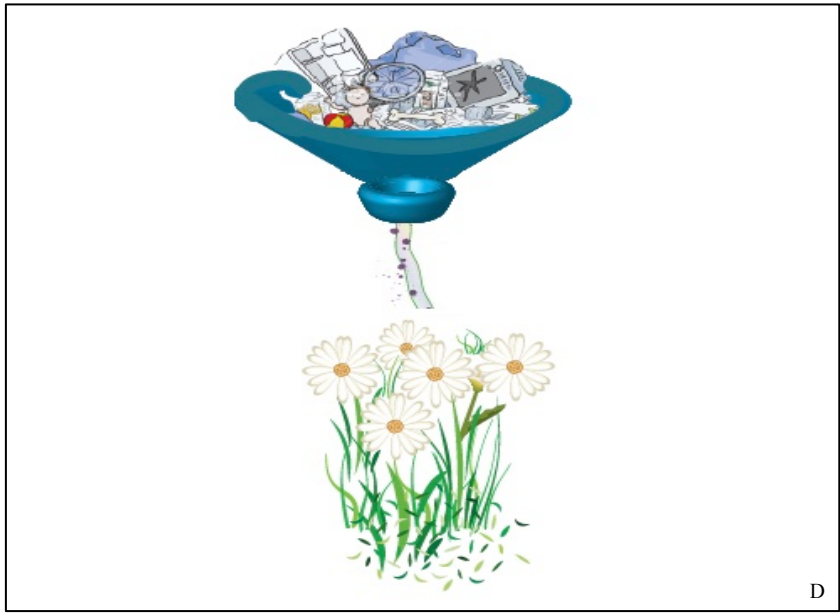

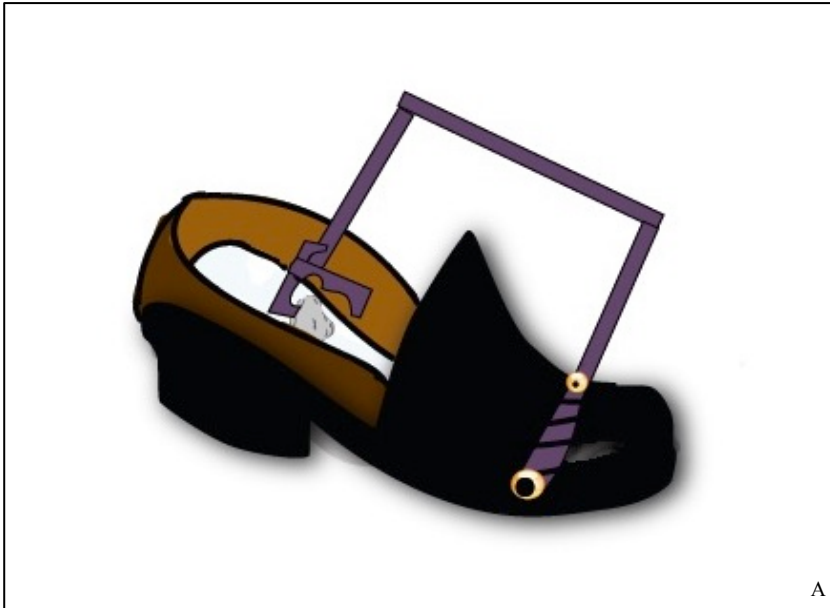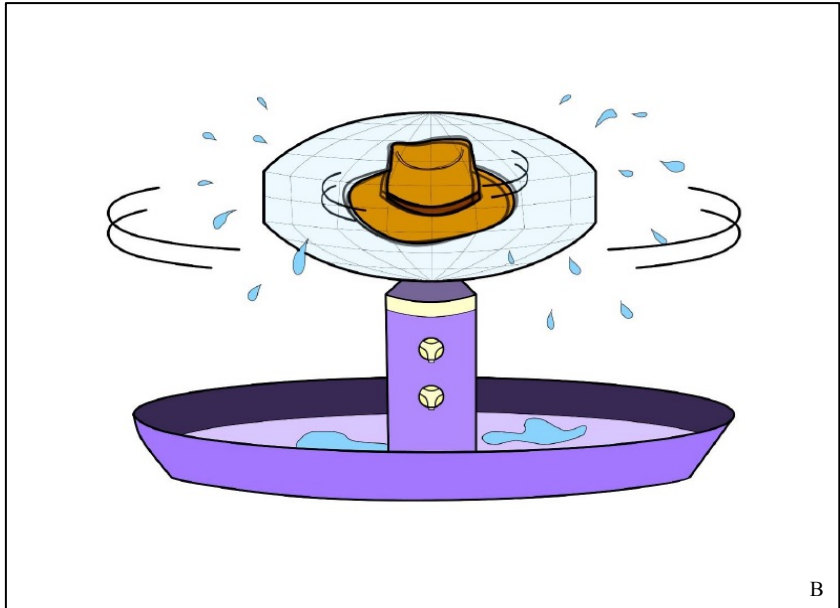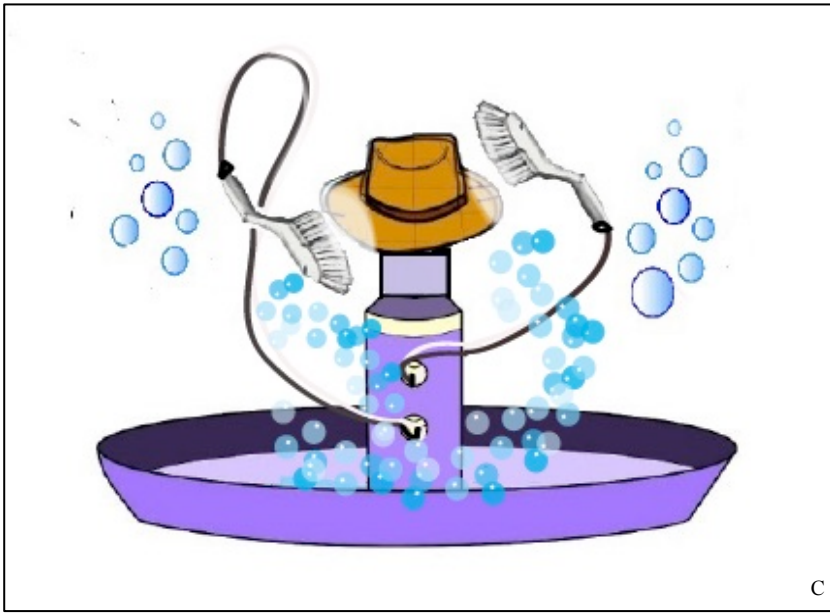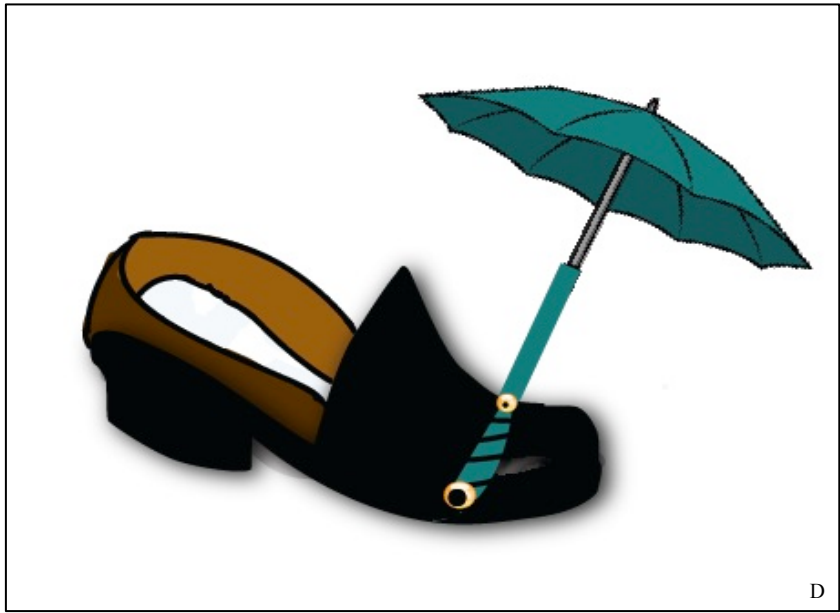

Supplement: Supplementary file 2 [file 1]
